# Supplementary material for: The application of amide units in the construction of neutral functional dyes for mitochondrial staining
Source: Royal Society of Chemistry journal article supplement (doi:10.1039/d0tb02885a), 2021-01-01
Supplement: d0tb02885a1.pdf [file d0tb02885a1.pdf]

# The application of amide unit in the construction of neutral functional dyes for mitochondrial staining

Wei Ma, ‡<sup>a</sup> Bing Xu, ‡<sup>b</sup> Ru Sun, <sup>a</sup> Yu-Jie Xu, \*<sup>b</sup> Jian-Feng Ge<sup>\*,a,c</sup>

<sup>a</sup> College of Chemistry, Chemical Engineering and Material Science, Soochow University, Suzhou, Jiangsu 215123, China.

<sup>b</sup> State Key Laboratory of Radiation Medicine and Protection, School of Radiation Medicine and Protection and Collaborative Innovation Center of Radiation Medicine of Jiangsu Higher Education Institutions, Soochow University, Suzhou, Jiangsu 215123, China.

<sup>c</sup> Jiangsu Key Laboratory of Medical Optics, Suzhou Institute of Biomedical Engineering and Technology, Chinese Academy of Sciences, Suzhou, Jiangsu 215123, China

## Index

|                                                                                                                                                                                                                                                                                                                                                                                                                                                                                          |   |
|------------------------------------------------------------------------------------------------------------------------------------------------------------------------------------------------------------------------------------------------------------------------------------------------------------------------------------------------------------------------------------------------------------------------------------------------------------------------------------------|---|
| <b>1. Table</b> .....                                                                                                                                                                                                                                                                                                                                                                                                                                                                    | 5 |
| <b>Table S1</b> A summary of optical changes of dyes <b>2a-e</b> in different solvents.....                                                                                                                                                                                                                                                                                                                                                                                              | 5 |
| <b>Table S2</b> A summary of optical changes of dyes <b>3a-e</b> in different solvents.....                                                                                                                                                                                                                                                                                                                                                                                              | 6 |
| <b>2. Figures</b> .....                                                                                                                                                                                                                                                                                                                                                                                                                                                                  | 6 |
| <b>Fig. S1</b> Absorption spectra of <b>2a</b> (a), <b>2b</b> (b), <b>2c</b> (c) <b>2d</b> (d) and <b>2e</b> (e) with the concentration of 10 μM in different solvents.....                                                                                                                                                                                                                                                                                                              | 6 |
| <b>Fig. S2</b> Absorption spectra of <b>3a</b> (a), <b>3b</b> (b), <b>3c</b> (c) <b>3d</b> (d) and <b>3e</b> (e) with the concentration of 10 μM in different solvents.....                                                                                                                                                                                                                                                                                                              | 7 |
| <b>Fig. S3</b> Emission spectra of <b>2b</b> (a) and <b>3b</b> (c) in different solvents, inset showed photographs of them under 365 nm irradiation in dark condition and their CIE chromaticity diagram; <b>2b</b> was excited at 540 nm, slit widths: 1.5 nm/3 nm; <b>3b</b> was excited at 390 nm, slit widths: 1.5 nm/1.5 nm. ....                                                                                                                                                   | 7 |
| <b>Fig. S4</b> Emission spectra of <b>2c</b> (a) and <b>3c</b> (c) in different solvents, inset showed photographs of them under 365 nm irradiation in dark condition and their CIE chromaticity diagram; <b>2c</b> was excited at 540 nm, slit widths: 1.5 nm/3 nm; <b>3c</b> was excited at 390 nm, slit widths: 1.5 nm/1.5 nm.....                                                                                                                                                    | 7 |
| <b>Fig. S5</b> Emission spectra of <b>2d</b> (a) and <b>3d</b> (c) in different solvents, inset showed photographs of them under 365 nm irradiation in dark condition and their CIE chromaticity diagram; <b>2d</b> was excited at 540 nm, slit widths: 1.5 nm/3 nm; <b>3d</b> was excited at 390 nm, slit widths: 1.5 nm/1.5 nm. ....                                                                                                                                                   | 7 |
| <b>Fig. S6</b> Emission spectra of <b>2e</b> (a) and <b>3e</b> (c) in different solvents, inset showed photographs of them under 365 nm irradiation in dark condition and their CIE chromaticity diagram; <b>2e</b> was excited at 540 nm, slit widths: 1.5 nm/3 nm; <b>3e</b> was excited at 390 nm, slit widths: 1.5 nm/1.5 nm. ....                                                                                                                                                   | 8 |
| <b>Fig. S7</b> Percentages of cell viabilities of HeLa cells after treatment with dyes <b>3a-e</b> for 6 hours. ....                                                                                                                                                                                                                                                                                                                                                                     | 8 |
| <b>Fig. S8</b> Confocal fluorescence images of HeLa cells with dye <b>2b</b> . (a) Bright field images; (b) confocal image (red channel) of cells with dye <b>2b</b> (2 μM); (c) confocal image (green channel) of cells with Mito-Tracker s Green FM (100 nM); (d) merged images of the green and red channels; (e) fluorescence intensities of the regions of interest (ROIs) across the cells; (f) fluorescence intensity correlation plot of the green channel and red channel. .... | 8 |
| <b>Fig. S9</b> Confocal fluorescence images of HeLa cells with dye <b>2c</b> . (a) Bright field images; (b) confocal image (red channel) of cells with dye <b>2c</b> (2 μM); (c) confocal image (green channel) of cells with Mito-Tracker s Green FM                                                                                                                                                                                                                                    |   |

(100 nM); (d) merged images of the green and red channels; (e) fluorescence intensities of the regions of interest (ROIs) across the cells; (f) fluorescence intensity correlation plot of the green channel and red channel. ....9

**Fig. S10** Confocal fluorescence images of HeLa cells with dye **2d**. (a) Bright field images; (b) confocal image (red channel) of cells with dye **2d** (2  $\mu$ M); (c) confocal image (green channel) of cells with Mito-Tracker s Green FM (100 nM); (d) merged images of the green and red channels; (e) fluorescence intensities of the regions of interest (ROIs) across the cells; (f) fluorescence intensity correlation plot of the green channel and red channel. ....9

**Fig. S11** Confocal fluorescence images of HeLa cells with dye **2e**. (a) Bright field images; (b) confocal image (red channel) of cells with dye **2e** (2  $\mu$ M); (c) confocal image (green channel) of cells with Mito-Tracker s Green FM (100 nM); (d) merged images of the green and red channels; (e) fluorescence intensities of the regions of interest (ROIs) across the cells; (f) fluorescence intensity correlation plot of the green channel and red channel. .... 10

**Fig. 12** Confocal fluorescence image of HeLa cells with dye **3b**. (a) bright field images; (b) confocal image (blue channel) of cells with dye **3b** (2  $\mu$ M); (c) confocal image (red channel) of cells with MitoTracker® Red CMXRos (100 nM); (d) merged images of blue and red channels; (e) fluorescence intensities of the regions of interest (ROIs) across the cells, (f) fluorescence intensity correlation plot of blue channel and red channel. ....10

**Fig. S13** Confocal fluorescence image of HeLa cells with dye **3c**. (a) bright field images; (b) confocal image (blue channel) of cells with dye **3c** (2  $\mu$ M); (c) confocal image (red channel) of cells with MitoTracker® Red CMXRos (100 nM); (d) merged images of blue and red channels; (e) fluorescence intensities of the regions of interest (ROIs) across the cells, (f) fluorescence intensity correlation plot of blue channel and red channel. ....11

**Fig. S14** Confocal fluorescence image of HeLa cells with dye **3d**. (a) bright field images; (b) confocal image (blue channel) of cells with dye **3d** (2  $\mu$ M); (c) confocal image (red channel) of cells with MitoTracker® Red CMXRos (100 nM); (d) merged images of blue and red channels; (e) fluorescence intensities of the regions of interest (ROIs) across the cells, (f) fluorescence intensity correlation plot of blue channel and red channel. ....11

**Fig. S15** Confocal fluorescence image of HeLa cells with dye **3e**. (a) bright field images; (b) confocal image (blue channel) of cells with dye **3e** (2  $\mu$ M); (c) confocal image (red channel) of cells with MitoTracker® Red CMXRos (100 nM); (d) merged images of blue and red channels; (e) fluorescence intensities of the regions of interest (ROIs) across the cells, (f) fluorescence intensity correlation plot of blue channel and red channel. ....11

**Fig. S16** Confocal fluorescence image of HeLa cells with dye **3a**. (a) bright field images; (b) confocal image (blue channel) of cells with dye **3a** (10  $\mu$ M); (c) confocal image (red channel) of cells with MitoTracker® Red CMXRos (100 nM); (d) merged images of blue and red channels; (e) fluorescence intensities of the regions of interest (ROIs) across the cells, (f) fluorescence intensity correlation plot of blue channel and red channel. ....12

**Fig. S17** Confocal fluorescence image of HeLa cells with dye **3a**. (a) bright field images; (b) confocal image (blue channel) of cells with dye **3a** (10  $\mu$ M); (c) confocal images (green channel) of cells with LysoTracker Green DND-26 (100 nM); (d) merged images of blue and green channels; (e) fluorescence intensities of the regions of interest (ROIs) across the cells;(f) fluorescence intensity correlation plot of blue channel and green channel. ...12

**Fig. S18** Confocal fluorescence image of HeLa cells with dye **3b**. (a) bright field images; (b) confocal image (blue channel) of cells with dye **3b** (10  $\mu$ M); (c) confocal image (red channel) of cells with MitoTracker® Red CMXRos (100 nM); (d) merged images of blue and red channels; (e) fluorescence intensities of the regions of interest (ROIs) across the cells, (f) fluorescence intensity correlation plot of blue channel and red channel. ....13

**Fig. S19** Confocal fluorescence image of HeLa cells with dye **3b**. (a) bright field images; (b) confocal image (blue channel) of cells with dye **3b** (10  $\mu$ M); (c) confocal images (green channel) of cells with LysoTracker Green DND-

|                                                                                                                                                                                                                                 |    |
|---------------------------------------------------------------------------------------------------------------------------------------------------------------------------------------------------------------------------------|----|
| 26 (100 nM); (d) merged images of blue and green channels; (e) fluorescence intensities of the regions of interest (ROIs) across the cells;(f) fluorescence intensity correlation plot of blue channel and green channel. ...13 |    |
| <b>Fig. S20</b> (a) Bright field images; (b-h) the images of dye <b>3a</b> in HeLa cells after 30 minutes of continuous irradiation by the excitation light source (405 nm). ....14                                             | 14 |
| <b>Fig. S21</b> <sup>1</sup> H NMR spectrum of dye <b>2a</b> . ....15                                                                                                                                                           | 15 |
| <b>Fig. S22</b> <sup>13</sup> C NMR spectrum of dye <b>2a</b> . ....15                                                                                                                                                          | 15 |
| <b>Fig. S23</b> HRMS (ESI <sup>+</sup> ) spectrum of dye <b>2a</b> . ....16                                                                                                                                                     | 16 |
| <b>Fig. S24</b> <sup>1</sup> H NMR spectrum of dye <b>2b</b> . ....16                                                                                                                                                           | 16 |
| <b>Fig. S25</b> <sup>13</sup> C NMR spectrum of dye <b>2b</b> . ....17                                                                                                                                                          | 17 |
| <b>Fig. S26</b> HRMS (ESI <sup>+</sup> ) spectrum of dye <b>2b</b> . ....17                                                                                                                                                     | 17 |
| <b>Fig. S27</b> <sup>1</sup> H NMR spectrum of dye <b>2c</b> . ....18                                                                                                                                                           | 18 |
| <b>Fig. S28</b> <sup>13</sup> C NMR spectrum of dye <b>2c</b> . ....18                                                                                                                                                          | 18 |
| <b>Fig. S29</b> HRMS (ESI <sup>+</sup> ) spectrum of dye <b>2c</b> . ....19                                                                                                                                                     | 19 |
| <b>Fig. S30</b> <sup>1</sup> H NMR spectrum of dye <b>2d</b> . ....19                                                                                                                                                           | 19 |
| <b>Fig. S31</b> <sup>13</sup> C NMR spectrum of dye <b>2d</b> . ....20                                                                                                                                                          | 20 |
| <b>Fig. S32</b> HRMS (ESI <sup>+</sup> ) spectrum of dye <b>2d</b> . ....20                                                                                                                                                     | 20 |
| <b>Fig. S33</b> <sup>1</sup> H NMR spectrum of dye <b>2e</b> . ....21                                                                                                                                                           | 21 |
| <b>Fig. S34</b> <sup>13</sup> C NMR spectrum of dye <b>2e</b> . ....21                                                                                                                                                          | 21 |
| <b>Fig. S35</b> HRMS (ESI <sup>+</sup> ) spectrum of dye <b>2e</b> . ....22                                                                                                                                                     | 22 |
| <b>Fig. S36</b> <sup>1</sup> H NMR spectrum of dye <b>3a</b> . ....22                                                                                                                                                           | 22 |
| <b>Fig. S37</b> <sup>13</sup> C NMR spectrum of dye <b>3a</b> . ....23                                                                                                                                                          | 23 |
| <b>Fig. S38</b> HRMS (ESI <sup>+</sup> ) spectrum of dye <b>3a</b> . ....23                                                                                                                                                     | 23 |
| <b>Fig. S39</b> <sup>1</sup> H NMR spectrum of dye <b>3b</b> . ....24                                                                                                                                                           | 24 |
| <b>Fig. S40</b> <sup>13</sup> C NMR spectrum of dye <b>3b</b> . ....24                                                                                                                                                          | 24 |
| <b>Fig. S41</b> HRMS (ESI <sup>+</sup> ) spectrum of dye <b>3b</b> . ....25                                                                                                                                                     | 25 |
| <b>Fig. S42</b> <sup>1</sup> H NMR spectrum of dye <b>3c</b> . ....25                                                                                                                                                           | 25 |
| <b>Fig. S43</b> <sup>13</sup> C NMR spectrum of dye <b>3c</b> . ....26                                                                                                                                                          | 26 |
| <b>Fig. S44</b> HRMS (ESI <sup>+</sup> ) spectrum of dye <b>3c</b> . ....26                                                                                                                                                     | 26 |
| <b>Fig. S45</b> <sup>1</sup> H NMR spectrum of dye <b>3d</b> . ....27                                                                                                                                                           | 27 |
| <b>Fig. S46</b> <sup>13</sup> C NMR spectrum of dye <b>3d</b> . ....27                                                                                                                                                          | 27 |
| <b>Fig. S47</b> HRMS (ESI <sup>+</sup> ) spectrum of dye <b>3d</b> . ....28                                                                                                                                                     | 28 |
| <b>Fig. S48</b> <sup>1</sup> H NMR spectrum of dye <b>3e</b> . ....29                                                                                                                                                           | 29 |
| <b>Fig. S49</b> <sup>13</sup> C NMR spectrum of dye <b>3e</b> . ....29                                                                                                                                                          | 29 |
| <b>Fig. S50</b> HRMS (ESI <sup>+</sup> ) spectrum of dye <b>3e</b> . ....29                                                                                                                                                     | 29 |
| <b>Fig. S51</b> Infrared spectra of dye <b>2a</b> . ....30                                                                                                                                                                      | 30 |



## 1. Table

**Table S1** A summary of optical changes of dyes **2a-e** in different solvents.

| Dyes      | Solvents          | $\lambda_{\text{Abs, max}}^{\text{a}}$ | $\lambda_{\text{Em, max}}^{\text{a}}$ | Stokes shift <sup>a</sup> | $\epsilon^{\text{b}}$ | $\Phi^{\text{c, d}}$   |
|-----------|-------------------|----------------------------------------|---------------------------------------|---------------------------|-----------------------|------------------------|
| <b>2a</b> | H <sub>2</sub> O  | 555                                    | <i>ND</i> <sup>e</sup>                | <i>ND</i> <sup>e</sup>    | 2.23                  | <i>ND</i> <sup>e</sup> |
| <b>2a</b> | DMSO              | 563                                    | 639                                   | 76                        | 4.33                  | 86                     |
| <b>2a</b> | MeOH              | 563                                    | 644                                   | 81                        | 4.21                  | 45                     |
| <b>2a</b> | CHCl <sub>3</sub> | 554                                    | 604                                   | 50                        | 4.32                  | 94                     |
| <b>2a</b> | THF               | 540                                    | 604                                   | 64                        | 4.12                  | 96                     |
| <b>2a</b> | TOL               | 538                                    | 591                                   | 53                        | 4.02                  | 89                     |
| <b>2b</b> | H <sub>2</sub> O  | 585                                    | <i>ND</i> <sup>e</sup>                | <i>ND</i> <sup>e</sup>    | 2.37                  | <i>ND</i> <sup>e</sup> |
| <b>2b</b> | DMSO              | 564                                    | 630                                   | 66                        | 6.07                  | 75                     |
| <b>2b</b> | MeOH              | 563                                    | 635                                   | 72                        | 5.70                  | 63                     |
| <b>2b</b> | CHCl <sub>3</sub> | 552                                    | 597                                   | 45                        | 5.98                  | 90                     |
| <b>2b</b> | THF               | 540                                    | 592                                   | 52                        | 5.74                  | 95                     |
| <b>2b</b> | TOL               | 536                                    | 589                                   | 53                        | 4.78                  | 93                     |
| <b>2c</b> | H <sub>2</sub> O  | 596                                    | <i>ND</i> <sup>e</sup>                | <i>ND</i> <sup>e</sup>    | 4.99                  | <i>ND</i> <sup>e</sup> |
| <b>2c</b> | DMSO              | 563                                    | 655                                   | 92                        | 5.36                  | 89                     |
| <b>2c</b> | MeOH              | 563                                    | 660                                   | 97                        | 4.60                  | 45                     |
| <b>2c</b> | CHCl <sub>3</sub> | 552                                    | 621                                   | 69                        | 5.09                  | 92                     |
| <b>2c</b> | THF               | 539                                    | 628                                   | 59                        | 4.94                  | 95                     |
| <b>2c</b> | TOL               | 535                                    | 618                                   | 83                        | 2.96                  | 93                     |
| <b>2d</b> | H <sub>2</sub> O  | 573                                    | <i>ND</i> <sup>e</sup>                | <i>ND</i> <sup>e</sup>    | 2.18                  | <i>ND</i> <sup>e</sup> |
| <b>2d</b> | DMSO              | 561                                    | 640                                   | 79                        | 3.15                  | 83                     |
| <b>2d</b> | MeOH              | 560                                    | 657                                   | 97                        | 3.10                  | 27                     |
| <b>2d</b> | CHCl <sub>3</sub> | 551                                    | 607                                   | 56                        | 3.31                  | 87                     |
| <b>2d</b> | THF               | 538                                    | 601                                   | 63                        | 3.24                  | 96                     |
| <b>2d</b> | TOL               | 535                                    | 586                                   | 51                        | 3.05                  | 92                     |
| <b>2e</b> | H <sub>2</sub> O  | 558                                    | <i>ND</i> <sup>e</sup>                | <i>ND</i> <sup>e</sup>    | 2.32                  | <i>ND</i> <sup>e</sup> |
| <b>2e</b> | DMSO              | 563                                    | 620                                   | 57                        | 3.92                  | 83                     |
| <b>2e</b> | MeOH              | 562                                    | 629                                   | 67                        | 3.75                  | 23                     |
| <b>2e</b> | CHCl <sub>3</sub> | 553                                    | 585                                   | 32                        | 3.86                  | 74                     |
| <b>2e</b> | THF               | 539                                    | 581                                   | 42                        | 3.87                  | 90                     |
| <b>2e</b> | TOL               | 535                                    | 583                                   | 48                        | 3.72                  | 81                     |

<sup>a</sup> Reported in nm. <sup>b</sup> Cresyl violet ( $\Phi = 0.578$  in ethanol) was used as the reference dye. <sup>c</sup> reported in  $10^4 \text{ M}^{-1} \text{ cm}^{-1}$ . <sup>d</sup> not detectable. The water solutions contained 1% DMSO.

**Table S2** A summary of optical changes of dyes **3a-e** in different solvents.

| Dyes      | Solvents          | $\lambda_{\text{Abs,max}}^a$ | $\lambda_{\text{Em,max}}^a$ | Stokes shift <sup>a</sup> | $\epsilon^b$ | $\Phi^{c,d}$ |
|-----------|-------------------|------------------------------|-----------------------------|---------------------------|--------------|--------------|
| <b>3a</b> | H <sub>2</sub> O  | 398                          | 489                         | 91                        | 2.04         | 38           |
| <b>3a</b> | DMSO              | 386                          | 482                         | 96                        | 3.16         | 80           |
| <b>3a</b> | MeOH              | 388                          | 471                         | 83                        | 3.28         | 89           |
| <b>3a</b> | CHCl <sub>3</sub> | 388                          | 457                         | 69                        | 3.22         | 65           |
| <b>3a</b> | THF               | 379                          | 469                         | 90                        | 3.34         | 68           |
| <b>3a</b> | TOL               | 379                          | 458                         | 79                        | 3.29         | 55           |
| <b>3b</b> | H <sub>2</sub> O  | 393                          | 481                         | 88                        | 3.05         | 31           |
| <b>3b</b> | DMSO              | 387                          | 483                         | 96                        | 3.08         | 77           |
| <b>3b</b> | MeOH              | 386                          | 475                         | 89                        | 3.41         | 85           |
| <b>3b</b> | CHCl <sub>3</sub> | 386                          | 459                         | 73                        | 3.29         | 52           |
| <b>3b</b> | THF               | 376                          | 459                         | 83                        | 3.44         | 48           |
| <b>3b</b> | TOL               | 379                          | 460                         | 81                        | 3.36         | 65           |
| <b>3c</b> | H <sub>2</sub> O  | 391                          | 479                         | 88                        | 2.94         | 50           |
| <b>3c</b> | DMSO              | 385                          | 472                         | 87                        | 3.47         | 78           |
| <b>3c</b> | MeOH              | 386                          | 469                         | 83                        | 3.61         | 93           |
| <b>3c</b> | CHCl <sub>3</sub> | 385                          | 455                         | 70                        | 3.57         | 97           |
| <b>3c</b> | THF               | 376                          | 462                         | 86                        | 3.76         | 57           |
| <b>3c</b> | TOL               | 378                          | 456                         | 78                        | 3.49         | 55           |
| <b>3d</b> | H <sub>2</sub> O  | 390                          | 482                         | 92                        | 1.78         | 55           |
| <b>3d</b> | DMSO              | 383                          | 475                         | 92                        | 3.15         | 71           |
| <b>3d</b> | MeOH              | 384                          | 470                         | 86                        | 3.29         | 65           |
| <b>3d</b> | CHCl <sub>3</sub> | 380                          | 457                         | 77                        | 3.49         | 54           |
| <b>3d</b> | THF               | 374                          | 459                         | 85                        | 3.51         | 48           |
| <b>3d</b> | TOL               | 374                          | 457                         | 83                        | 3.38         | 52           |
| <b>3e</b> | H <sub>2</sub> O  | 395                          | 483                         | 88                        | 2.55         | 67           |
| <b>3e</b> | DMSO              | 385                          | 470                         | 85                        | 3.31         | 90           |
| <b>3e</b> | MeOH              | 386                          | 468                         | 82                        | 3.48         | 92           |
| <b>3e</b> | CHCl <sub>3</sub> | 385                          | 458                         | 73                        | 3.39         | 67           |
| <b>3e</b> | THF               | 376                          | 455                         | 79                        | 3.69         | 45           |
| <b>3e</b> | TOL               | 375                          | 459                         | 84                        | 3.21         | 46           |

<sup>a</sup> Reported in nm. <sup>b</sup> Coumarin 153 ( $\Phi = 0.546$  in ethanol) was used as the reference dye. <sup>c</sup> reported in  $10^4 \text{ M}^{-1} \text{ cm}^{-1}$ . <sup>d</sup> not detectable. The water solutions contained 1% DMSO.

## 2. Figures

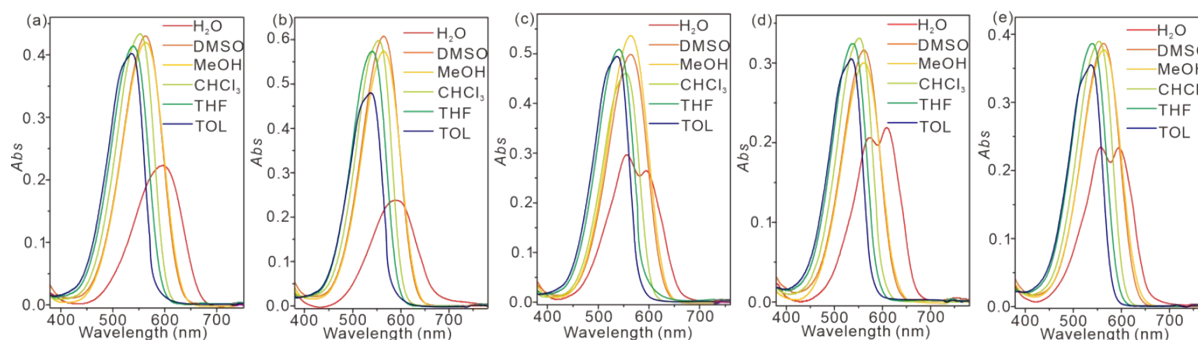**Fig. S1** Absorption spectra of **2a** (a), **2b** (b), **2c** (c) **2d** (d) and **2e** (e) with the concentration of 10  $\mu\text{M}$  in different solvents.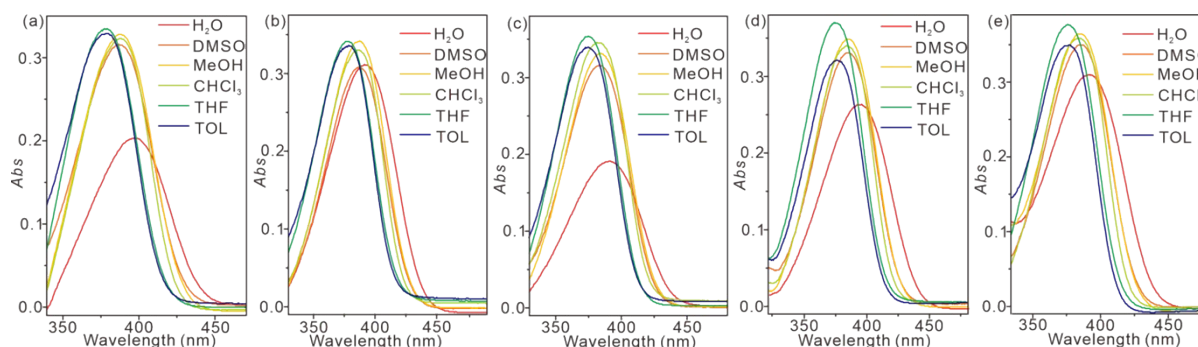

**Fig. S2** Absorption spectra of **3a** (a), **3b** (b), **3c** (c) **3d** (d) and **3e** (e) with the concentration of 10  $\mu\text{M}$  in different solvents.

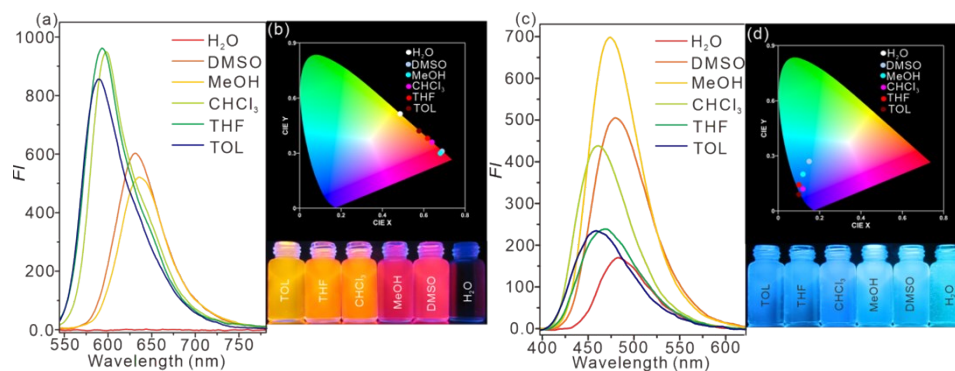

**Fig. S3** Emission spectra of **2b** (a) and **3b** (c) in different solvents, inset showed photographs of them under 365 nm irradiation in dark condition and their CIE chromaticity diagram; **2b** was excited at 540 nm, slit widths: 1.5 nm/3 nm; **3b** was excited at 390 nm, slit widths: 1.5 nm/1.5 nm.

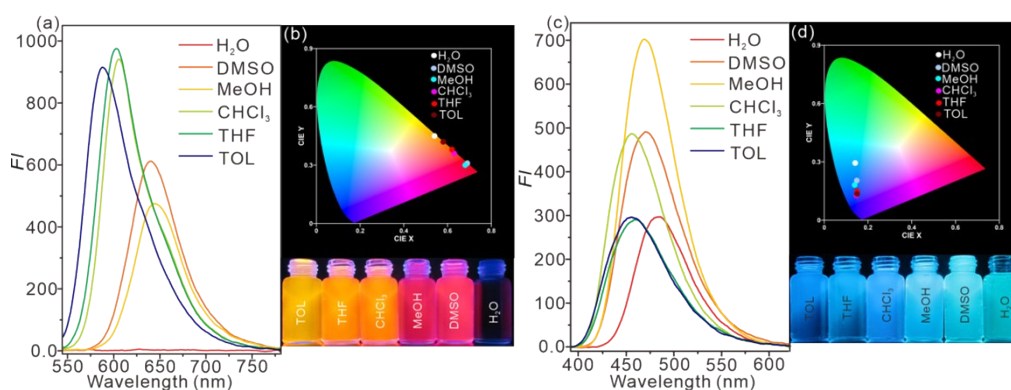

**Fig. S4** Emission spectra of **2c** (a) and **3c** (c) in different solvents, inset showed photographs of them under 365 nm irradiation in dark condition and their CIE chromaticity diagram; **2c** was excited at 540 nm, slit widths: 1.5 nm/3 nm; **3c** was excited at 390 nm, slit widths: 1.5 nm/1.5 nm.

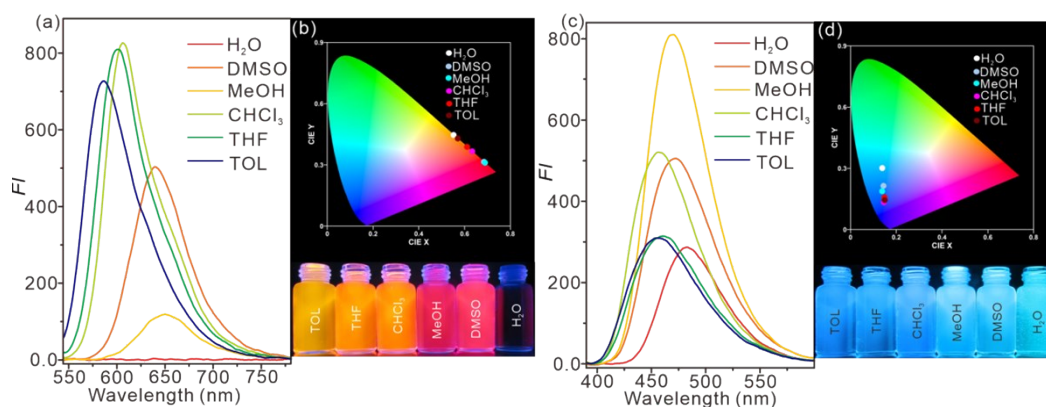

**Fig. S5** Emission spectra of **2d** (a) and **3d** (c) in different solvents, inset showed photographs of them under 365 nm irradiation in dark condition and their CIE chromaticity diagram; **2d** was excited at 540 nm, slit widths: 1.5 nm/3 nm; **3d** was excited at 390 nm, slit widths: 1.5 nm/1.5 nm.

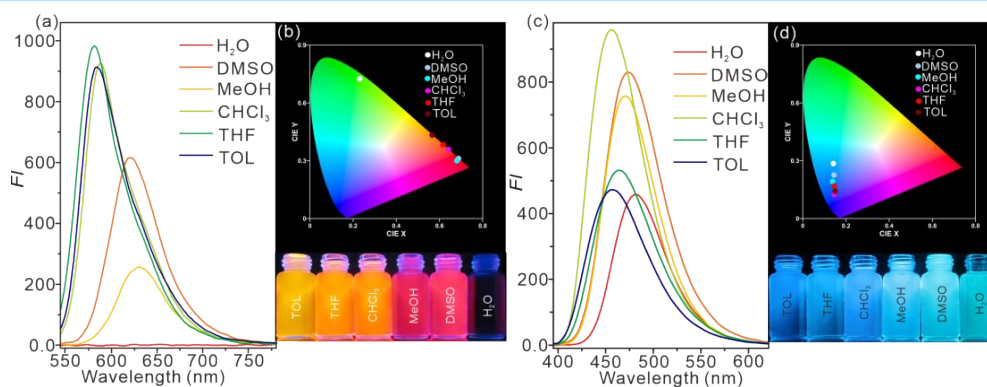

**Fig. S6** Emission spectra of **2e** (a) and **3e** (c) in different solvents, inset showed photographs of them under 365 nm irradiation in dark condition and their CIE chromaticity diagram; **2e** was excited at 540 nm, slit widths: 1.5 nm/3 nm; **3e** was excited at 390 nm, slit widths: 1.5 nm/1.5 nm.

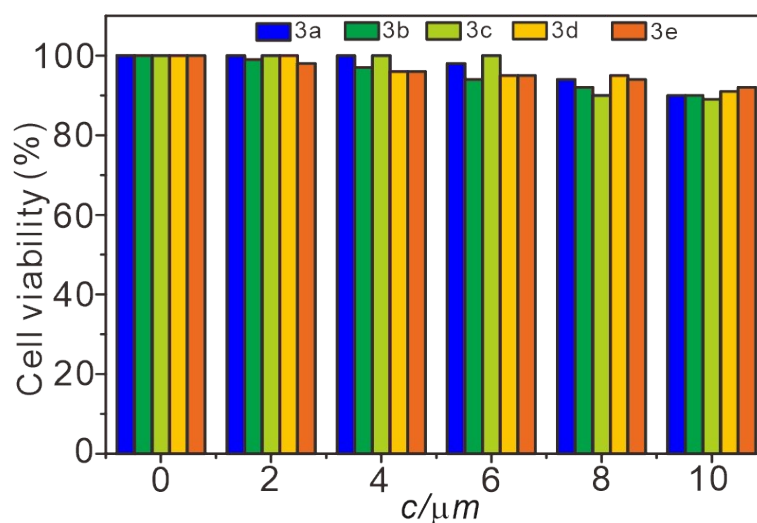

**Fig. S7** Percentages of cell viabilities of HeLa cells after treatment with dyes **3a-e** for 6 hours.

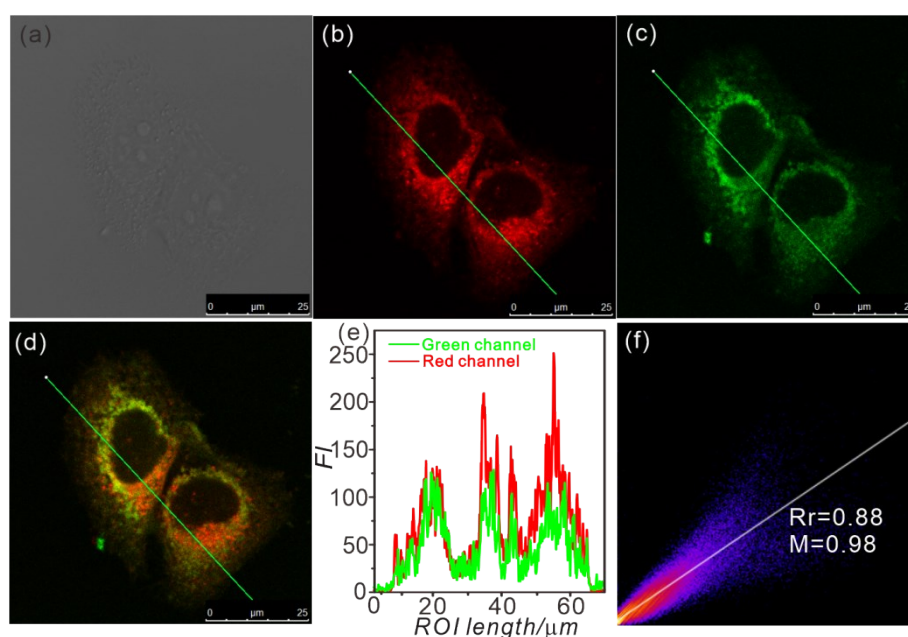

**Fig. S8** Confocal fluorescence images of HeLa cells with dye **2b**. (a) Bright field images; (b) confocal image (red channel) of cells with dye **2b** (2  $\mu$ M); (c) confocal image (green channel) of cells with Mito-Tracker s Green FM (100 nM); (d) merged images of the green and red channels; (e) fluorescence intensities of the regions of interest (ROIs) across the cells; (f) fluorescence intensity correlation plot of the green channel and red channel.



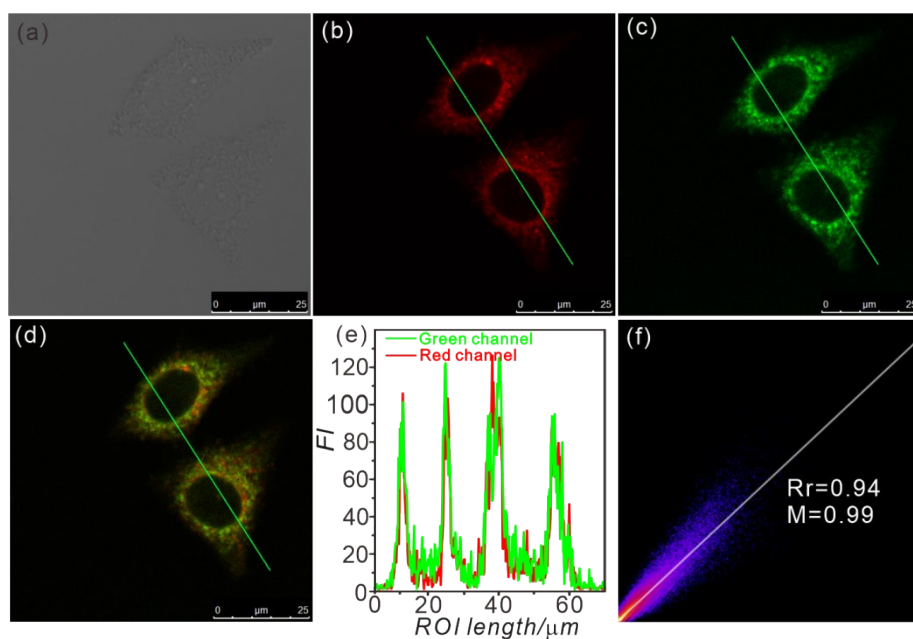

**Fig. S9** Confocal fluorescence images of HeLa cells with dye **2c**. (a) Bright field images; (b) confocal image (red channel) of cells with dye **2c** (2  $\mu\text{M}$ ); (c) confocal image (green channel) of cells with Mito-Tracker s Green FM (100 nM); (d) merged images of the green and red channels; (e) fluorescence intensities of the regions of interest (ROIs) across the cells; (f) fluorescence intensity correlation plot of the green channel and red channel.

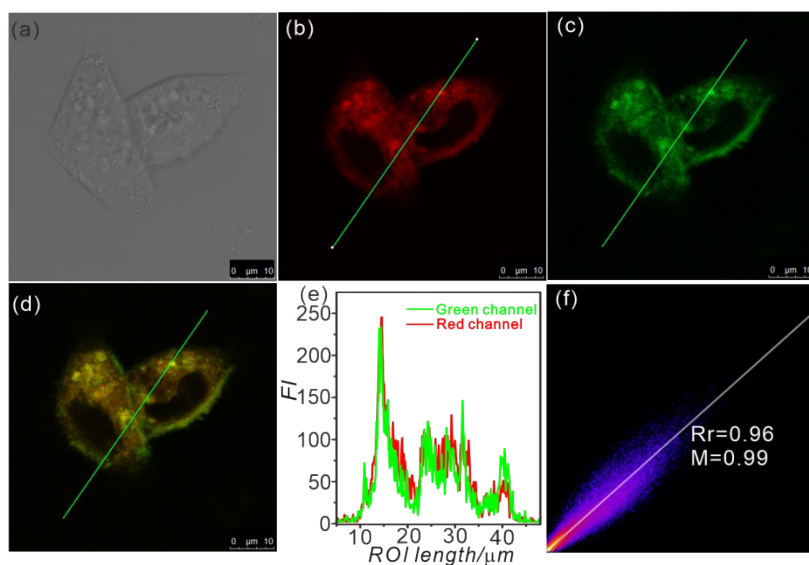

**Fig. S10** Confocal fluorescence images of HeLa cells with dye **2d**. (a) Bright field images; (b) confocal image (red channel) of cells with dye **2d** (2  $\mu\text{M}$ ); (c) confocal image (green channel) of cells with Mito-Tracker s Green FM (100 nM); (d) merged images of the green and red channels; (e) fluorescence intensities of the regions of interest (ROIs) across the cells; (f) fluorescence intensity correlation plot of the green channel and red channel.

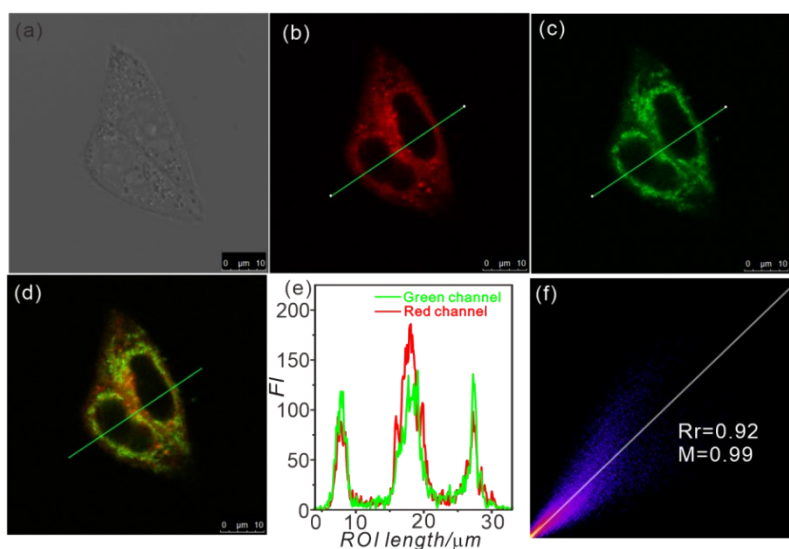

**Fig. S11** Confocal fluorescence images of HeLa cells with dye **2e**. (a) Bright field images; (b) confocal image (red channel) of cells with dye **2e** (2  $\mu\text{M}$ ); (c) confocal image (green channel) of cells with Mito-Tracker s Green FM (100 nM); (d) merged images of the green and red channels; (e) fluorescence intensities of the regions of interest (ROIs) across the cells; (f) fluorescence intensity correlation plot of the green channel and red channel.

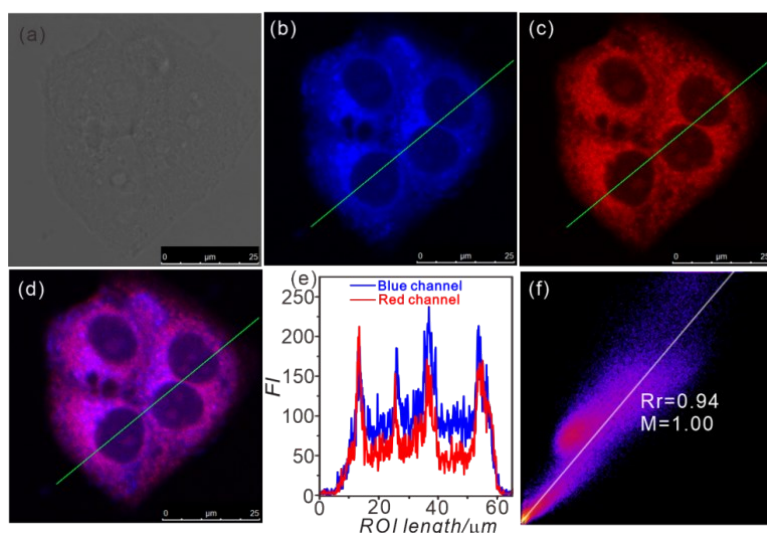

**Fig. 12** Confocal fluorescence image of HeLa cells with dye **3b**. (a) bright field images; (b) confocal image (blue channel) of cells with dye **3b** (2  $\mu\text{M}$ ); (c) confocal image (red channel) of cells with MitoTracker<sup>®</sup> Red CMXRos (100 nM); (d) merged images of blue and red channels; (e) fluorescence intensities of the regions of interest (ROIs) across the cells, (f) fluorescence intensity correlation plot of blue channel and red channel.

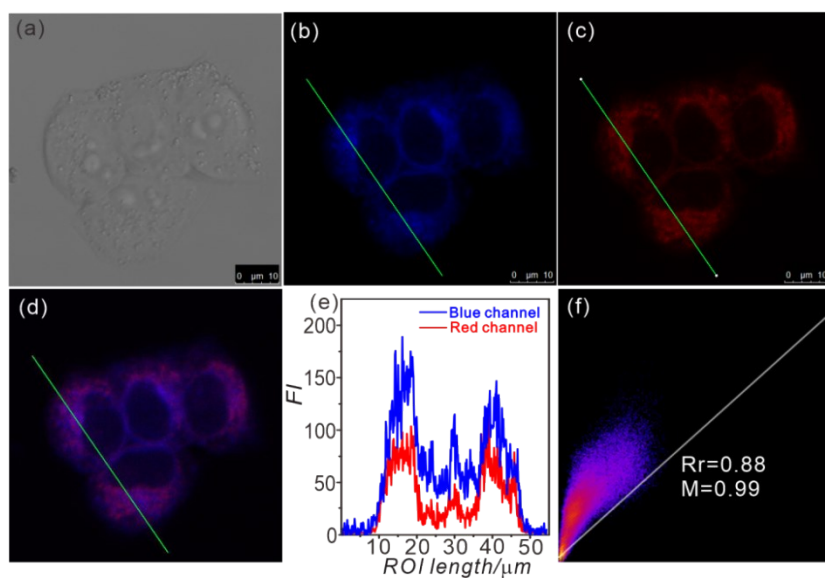

**Fig. S13** Confocal fluorescence image of HeLa cells with dye **3c**. (a) bright field images; (b) confocal image (blue channel) of cells with dye **3c** (2  $\mu\text{M}$ ); (c) confocal image (red channel) of cells with MitoTracker<sup>®</sup> Red CMXRos (100 nM); (d) merged images of blue and red channels; (e) fluorescence intensities of the regions of interest (ROIs) across the cells, (f) fluorescence intensity correlation plot of blue channel and red channel.

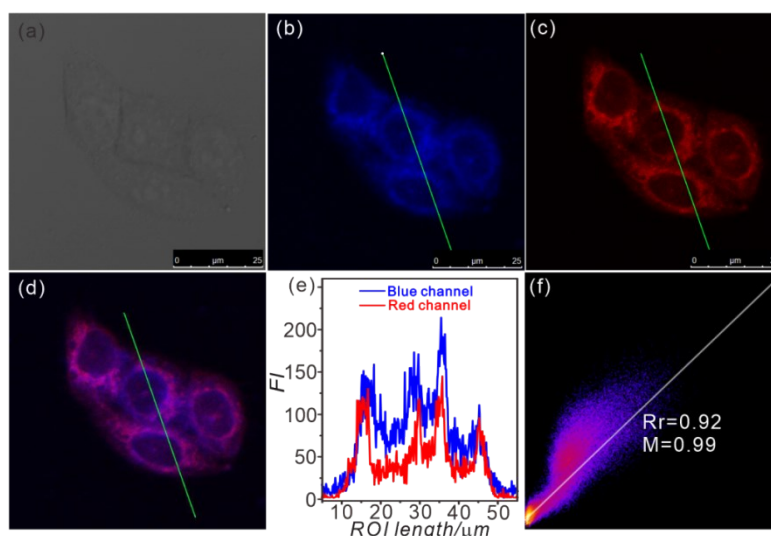

**Fig. S14** Confocal fluorescence image of HeLa cells with dye **3d**. (a) bright field images; (b) confocal image (blue channel) of cells with dye **3d** (2  $\mu\text{M}$ ); (c) confocal image (red channel) of cells with MitoTracker<sup>®</sup> Red CMXRos (100 nM); (d) merged images of blue and red channels; (e) fluorescence intensities of the regions of interest (ROIs) across the cells, (f) fluorescence intensity correlation plot of blue channel and red channel.

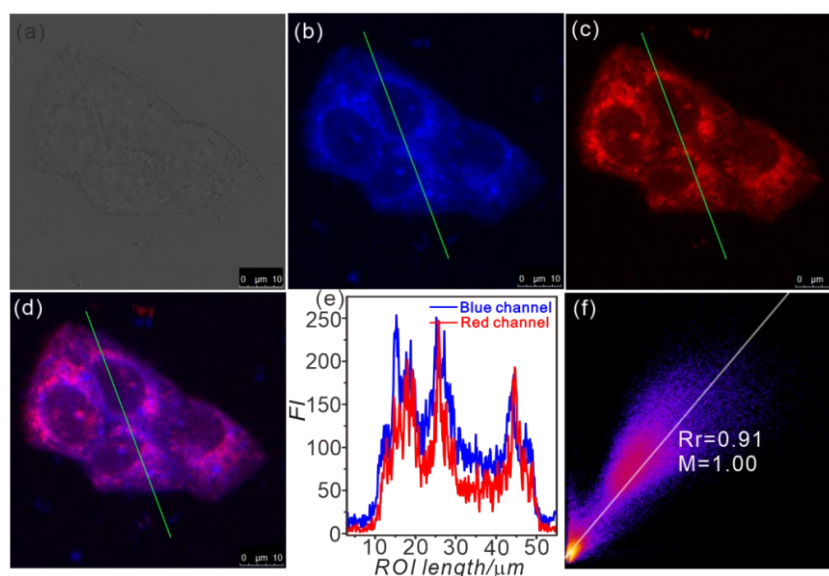

**Fig. S15** Confocal fluorescence image of HeLa cells with dye **3e**. (a) bright field images; (b) confocal image (blue channel) of cells with dye **3e** (2  $\mu\text{M}$ ); (c) confocal image (red channel) of cells with MitoTracker<sup>®</sup> Red CMXRos (100 nM); (d) merged images of blue and red channels; (e) fluorescence intensities of the regions of interest (ROIs) across the cells, (f) fluorescence intensity correlation plot of blue channel and red channel.

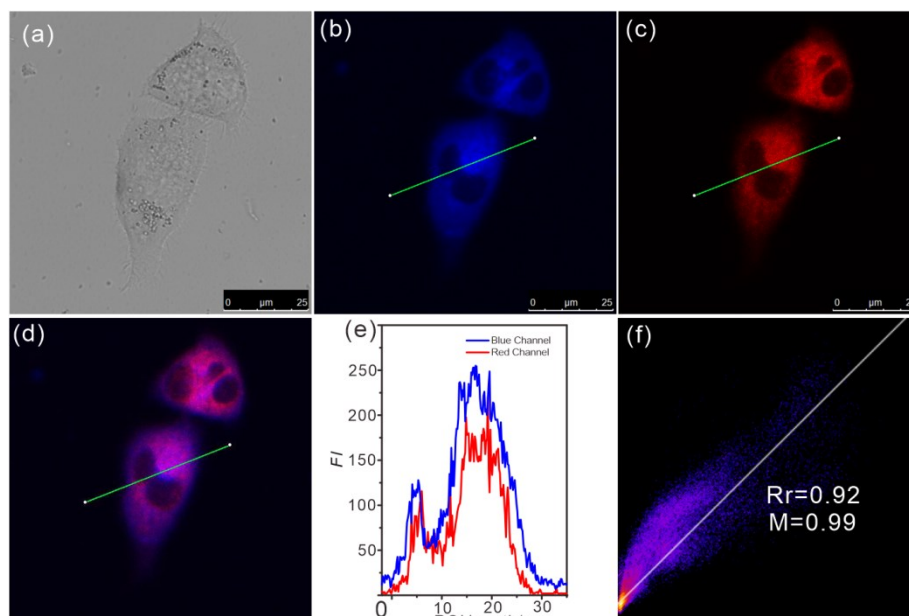

**Fig. S16** Confocal fluorescence image of HeLa cells with dye **3a**. (a) bright field images; (b) confocal image (blue channel) of cells with dye **3a** (10  $\mu\text{M}$ ); (c) confocal image (red channel) of cells with MitoTracker<sup>®</sup> Red CMXRos (100 nM); (d) merged images of blue and red channels; (e) fluorescence intensities of the regions of interest (ROIs) across the cells, (f) fluorescence intensity correlation plot of blue channel and red channel.

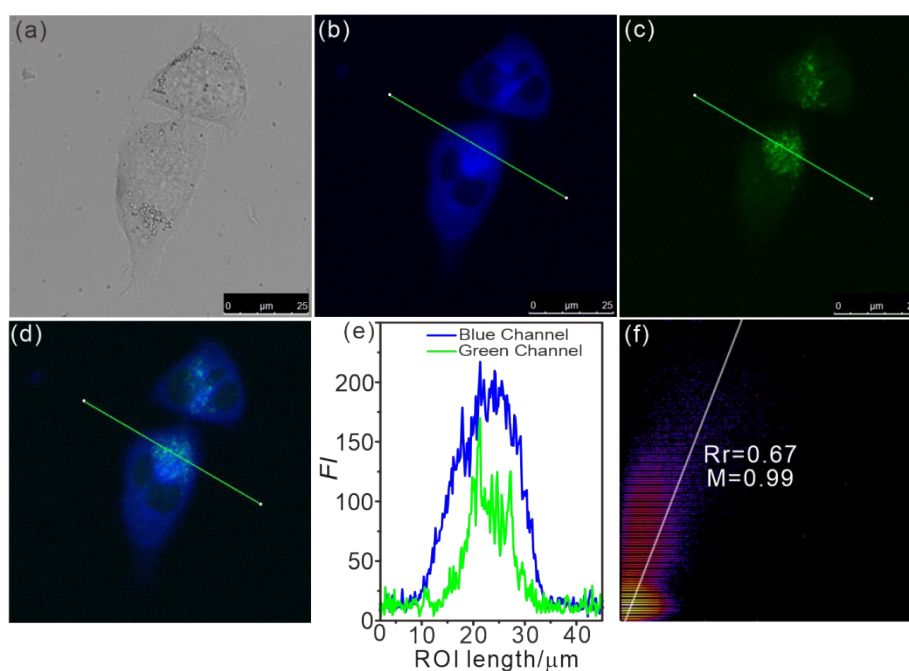

**Fig. S17** Confocal fluorescence image of HeLa cells with dye **3a**. (a) bright field images; (b) confocal image (blue channel) of cells with dye **3a** (10  $\mu\text{M}$ ); (c) confocal images (green channel) of cells with LysoTracker Green DND-26 (100 nM); (d) merged images of blue and green channels; (e) fluorescence intensities of the regions of interest (ROIs) across the cells; (f) fluorescence intensity correlation plot of blue channel and green channel.

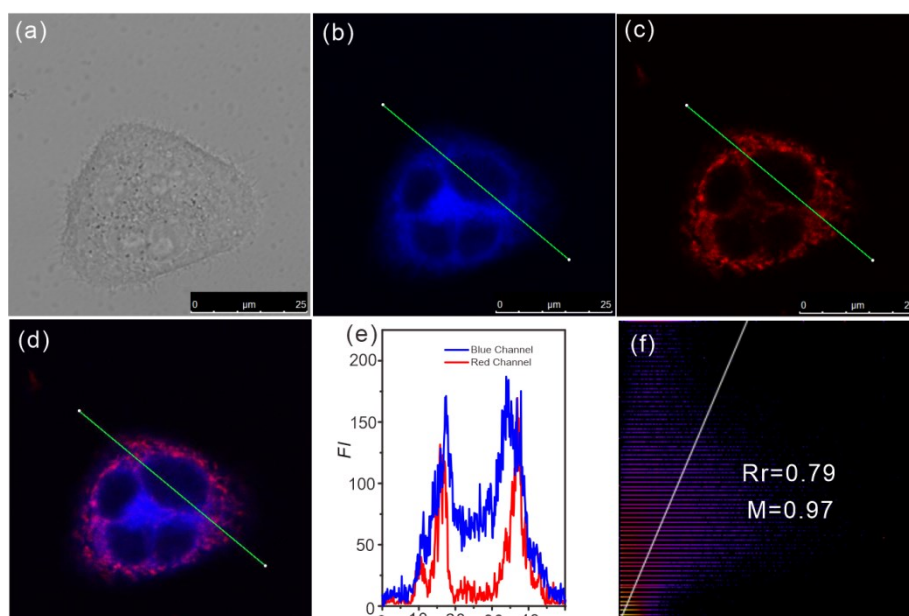

**Fig. S18** Confocal fluorescence image of HeLa cells with dye **3b**. (a) bright field images; (b) confocal image (blue channel) of cells with dye **3b** (10  $\mu\text{M}$ ); (c) confocal image (red channel) of cells with MitoTracker<sup>®</sup> Red CMXRos (100 nM); (d) merged images of blue and red channels; (e) fluorescence intensities of the regions of interest (ROIs) across the cells, (f) fluorescence intensity correlation plot of blue channel and red channel.

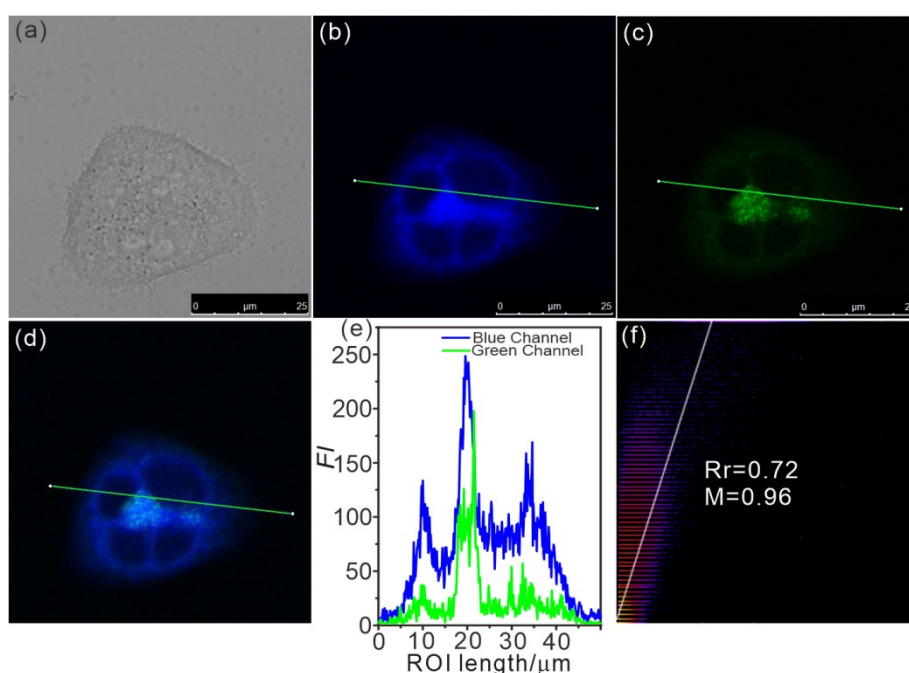

**Fig. S19** Confocal fluorescence image of HeLa cells with dye **3b**. (a) bright field images; (b) confocal image (blue channel) of cells with dye **3b** (10  $\mu\text{M}$ ); (c) confocal images (green channel) of cells with LysoTracker Green DND-26 (100 nM); (d) merged images of blue and green channels; (e) fluorescence intensities of the regions of interest (ROIs) across the cells; (f) fluorescence intensity correlation plot of blue channel and green channel.

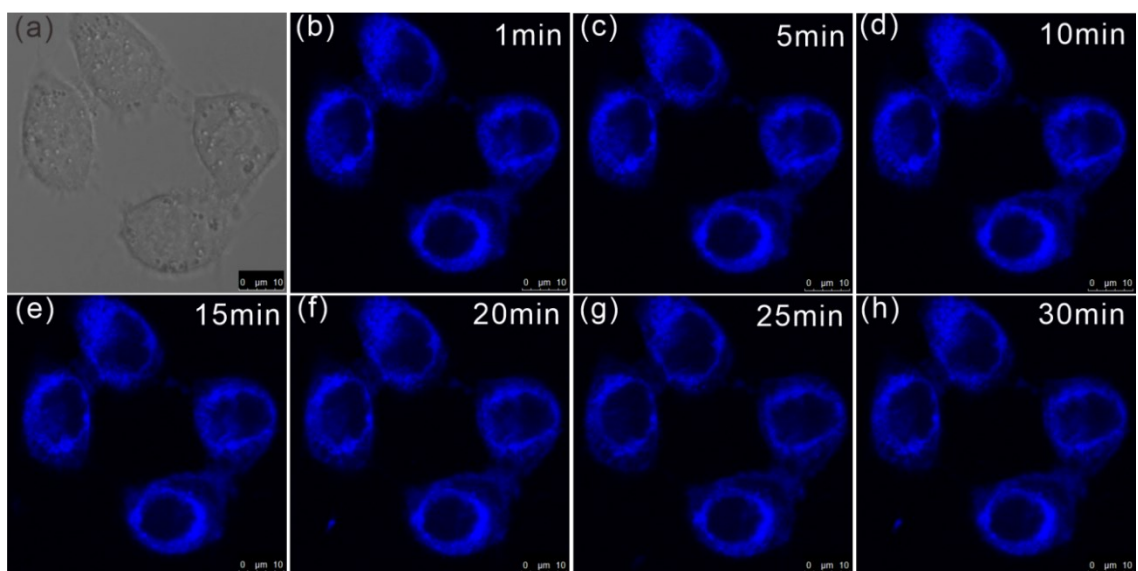

**Fig. S20** (a) Bright field images; (b-h) the images of dye **3a** in HeLa cells after 30 minutes of continuous irradiation by the excitation light source (405 nm).

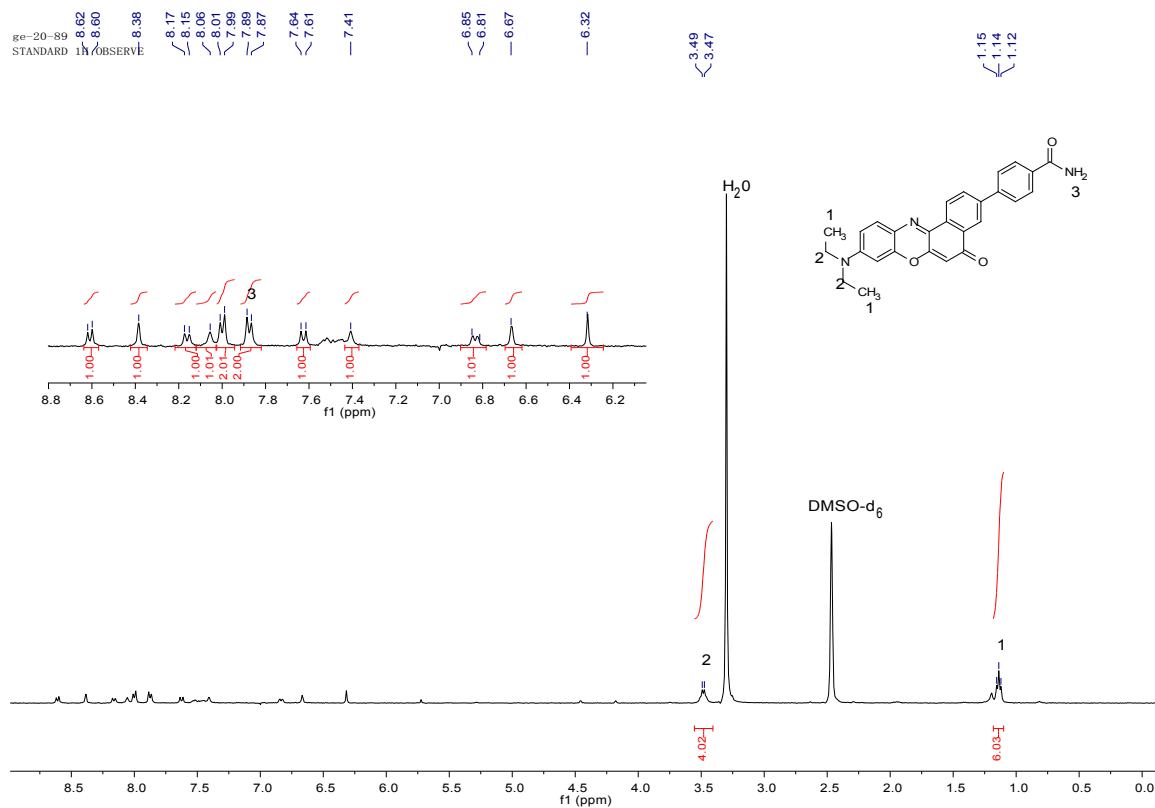Fig. S21 <sup>1</sup>H NMR spectrum of dye 2a.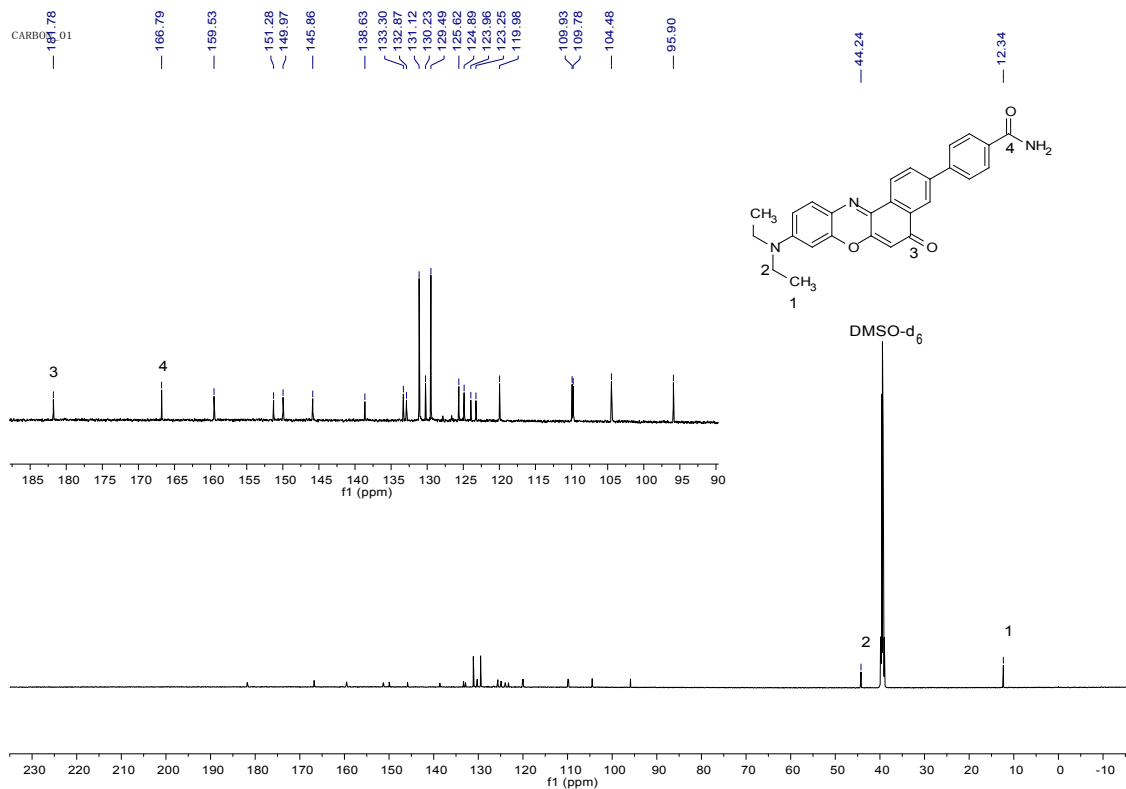Fig. S22 <sup>13</sup>C NMR spectrum of dye 2a.

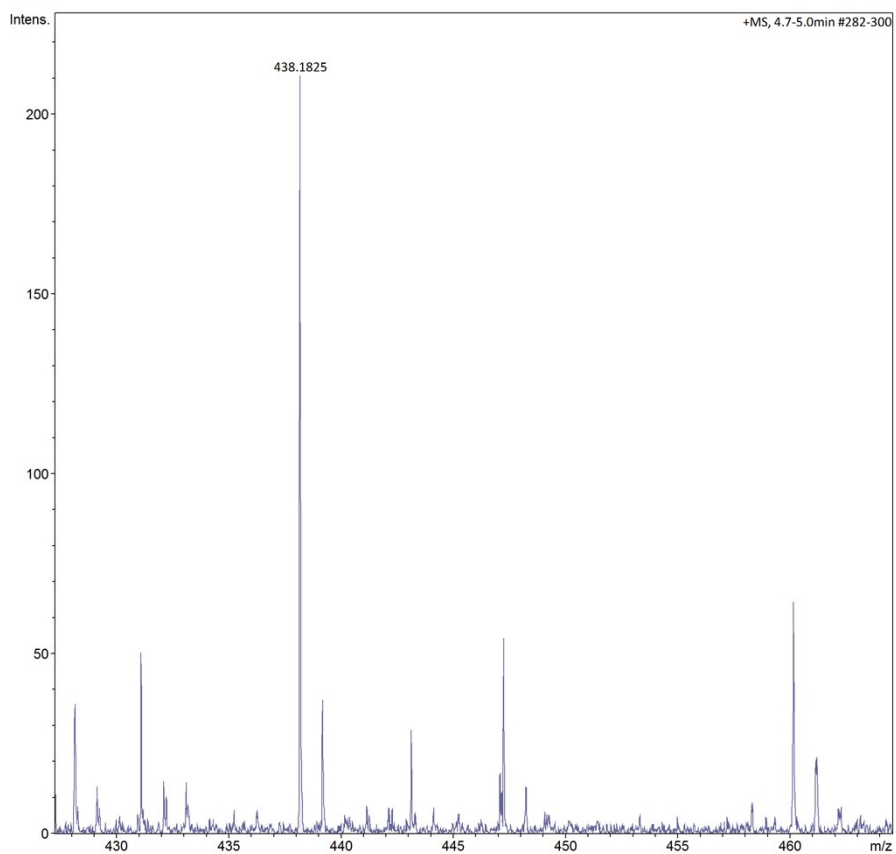

Fig. S23 HRMS (ESI<sup>+</sup>) spectrum of dye 2a.

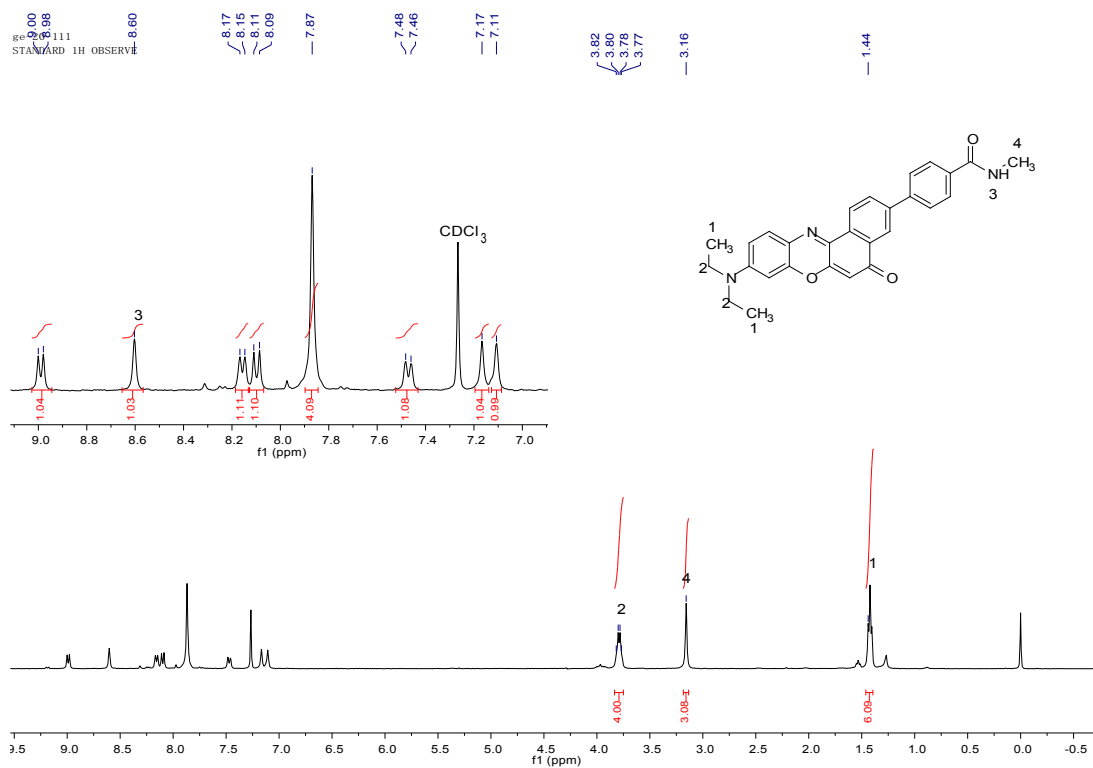

Fig. S24 <sup>1</sup>H NMR spectrum of dye 2b.



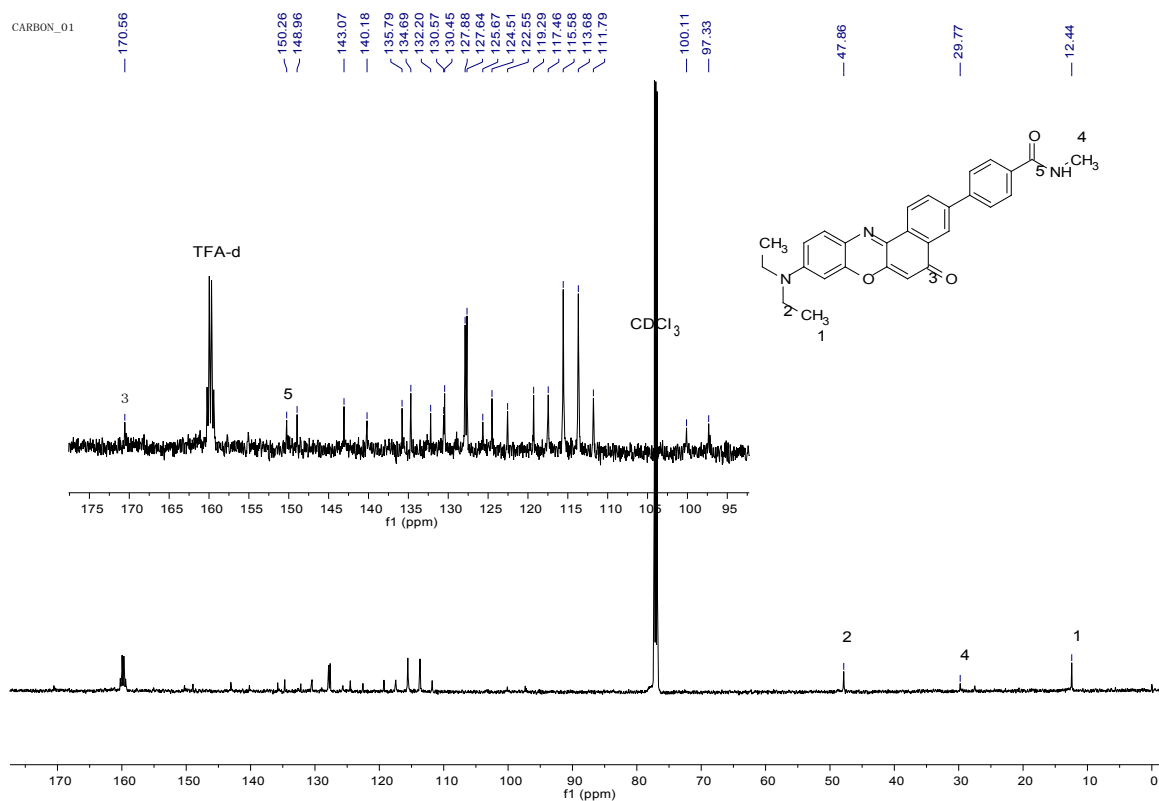

Fig. S25 <sup>13</sup>C NMR spectrum of dye **2b**.

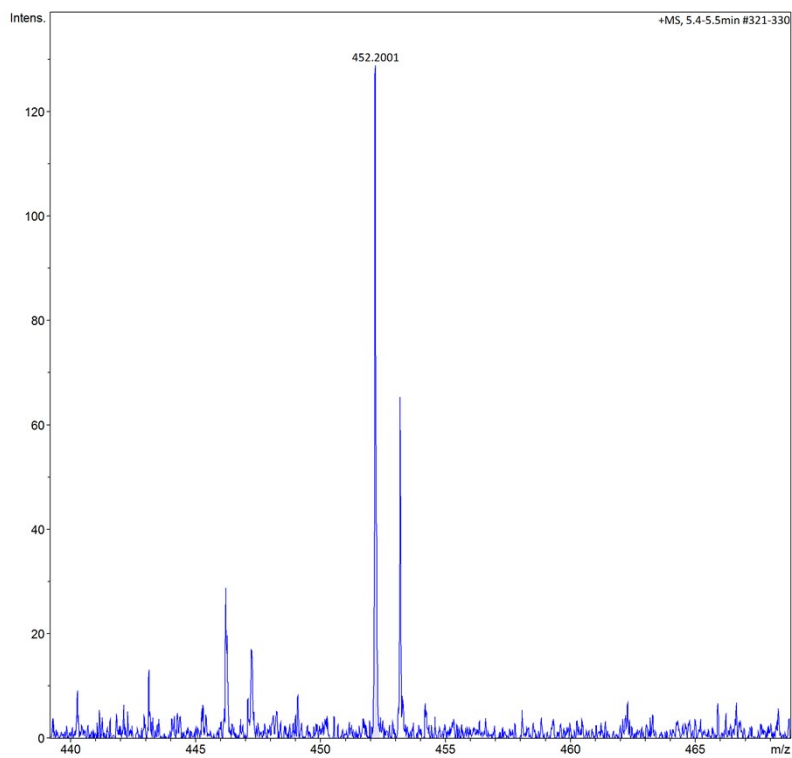

Fig. S26 HRMS (ESI<sup>+</sup>) spectrum of dye **2b**.

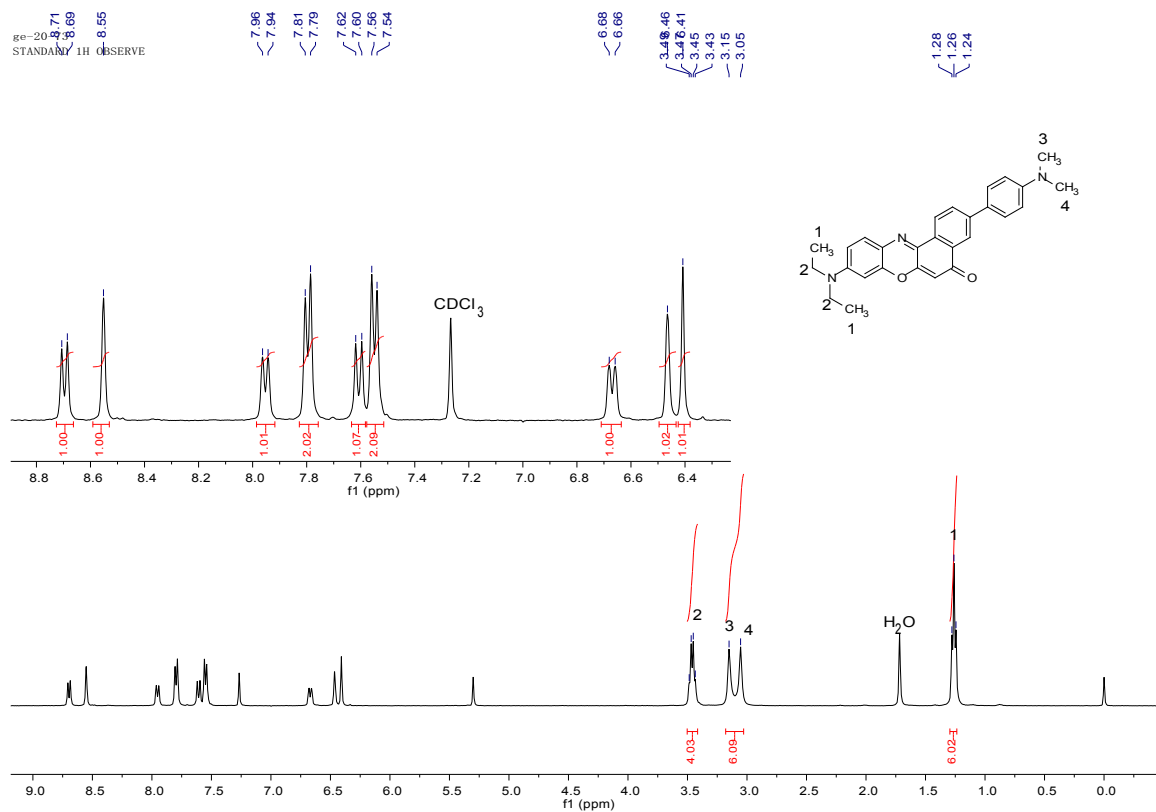

Fig. S27 <sup>1</sup>H NMR spectrum of dye 2c.

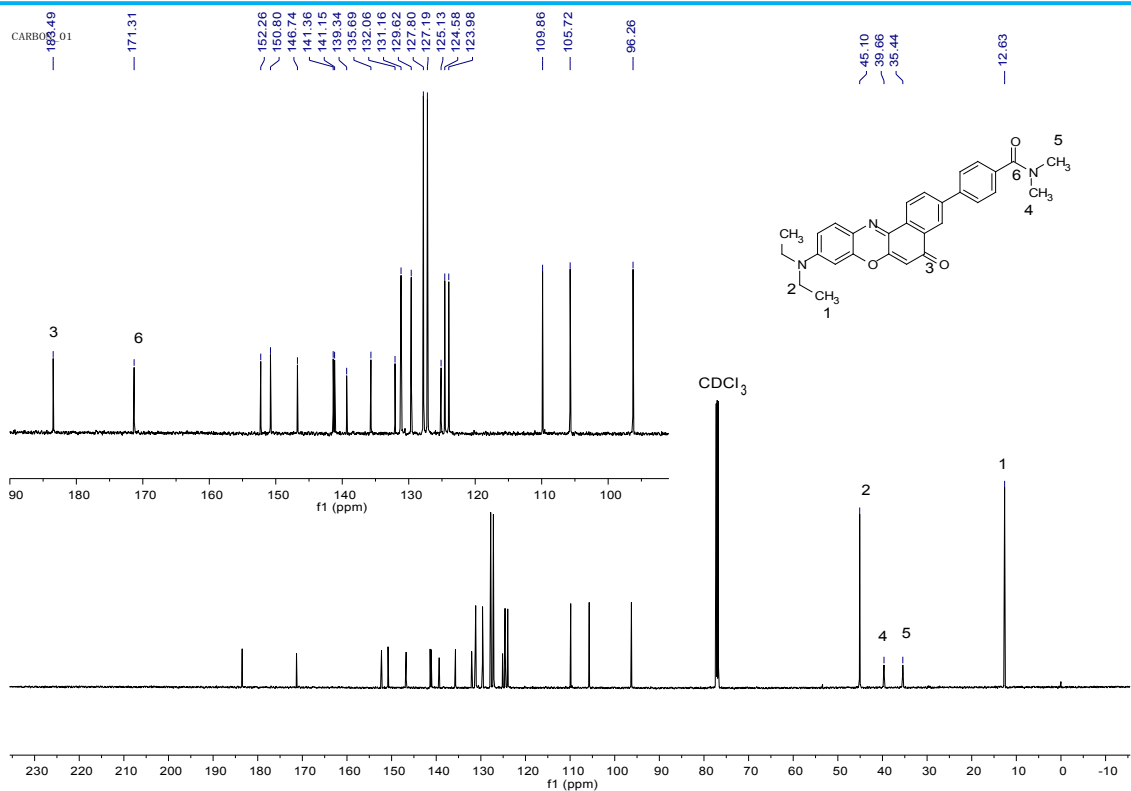

Fig. S28 <sup>13</sup>C NMR spectrum of dye 2c.

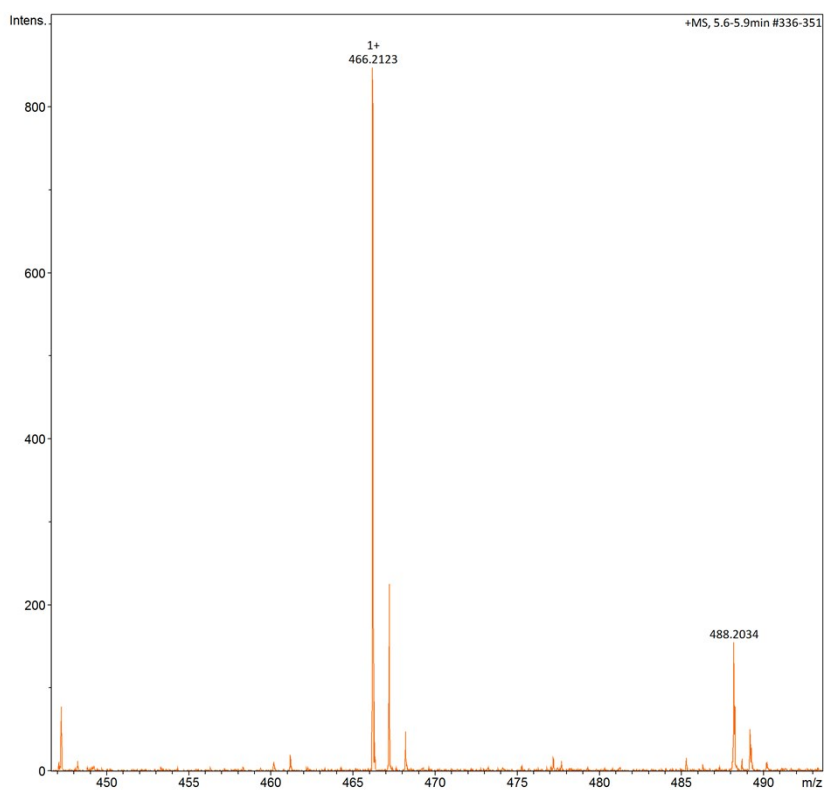

Fig. S29 HRMS (ESI<sup>+</sup>) spectrum of dye 2c.

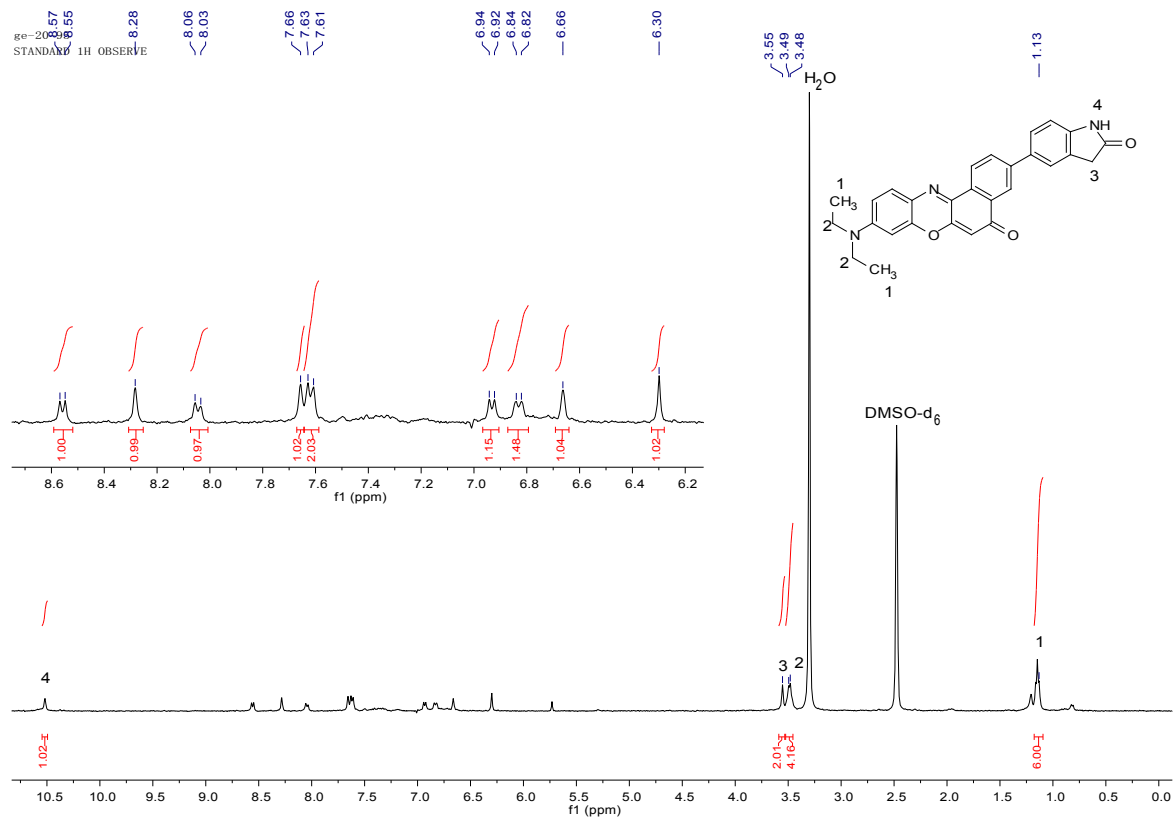

Fig. S30 <sup>1</sup>H NMR spectrum of dye 2d.

CARBON\_01

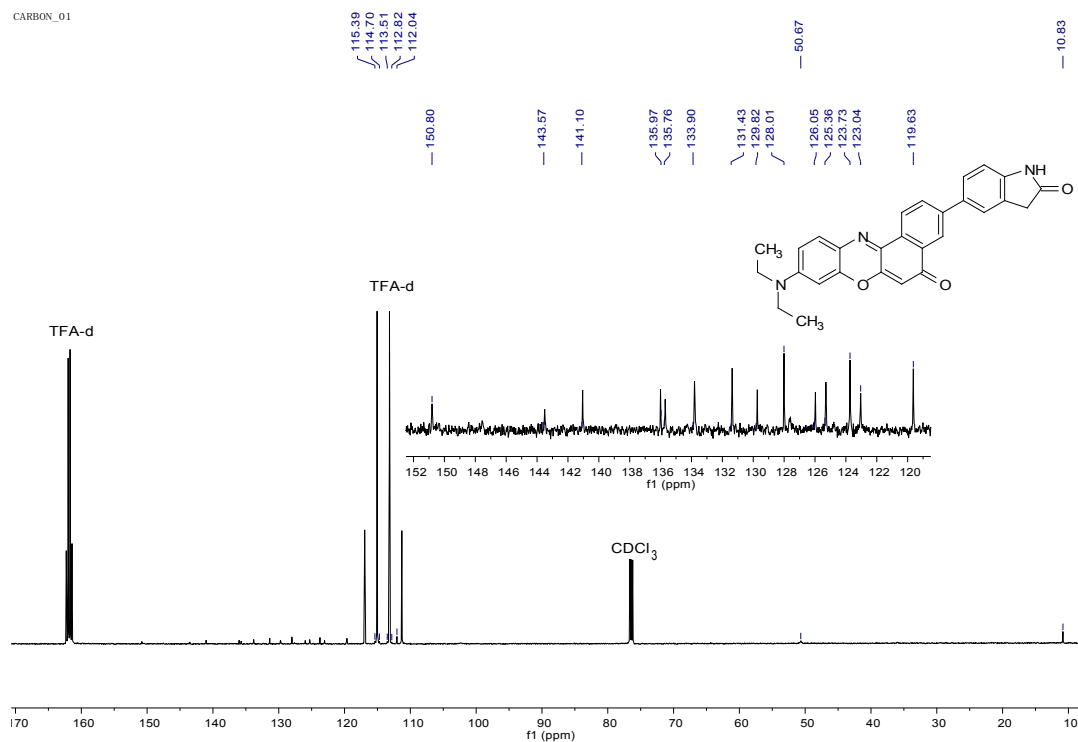

Fig. S31 <sup>13</sup>C NMR spectrum of dye **2d**.

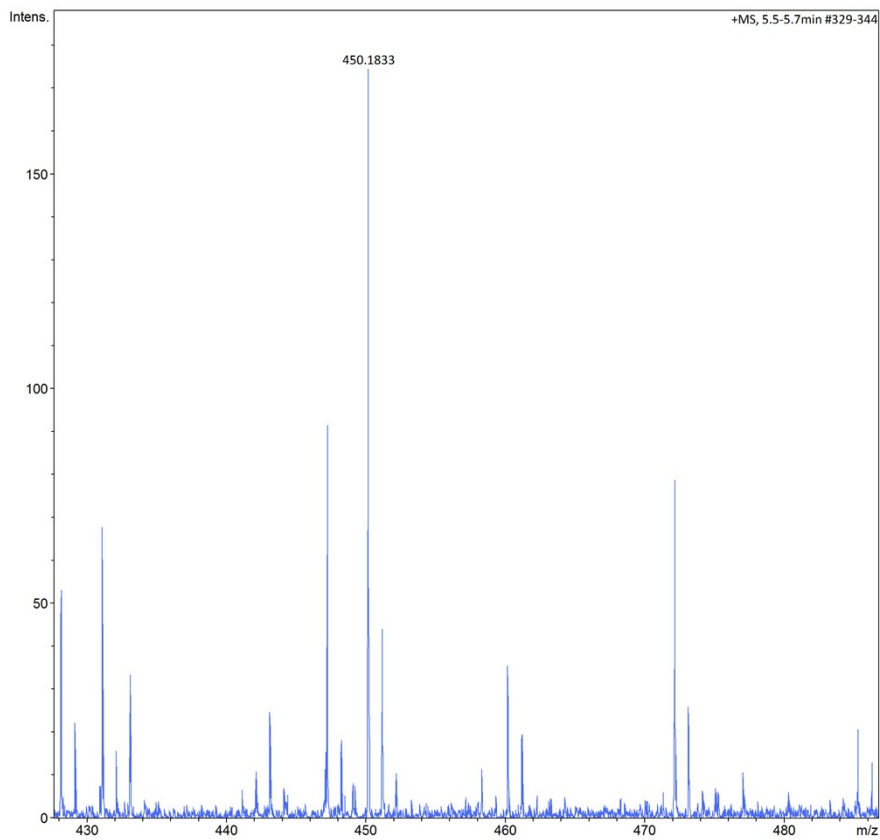

Fig. S32 HRMS (ESI<sup>+</sup>) spectrum of dye **2d**.

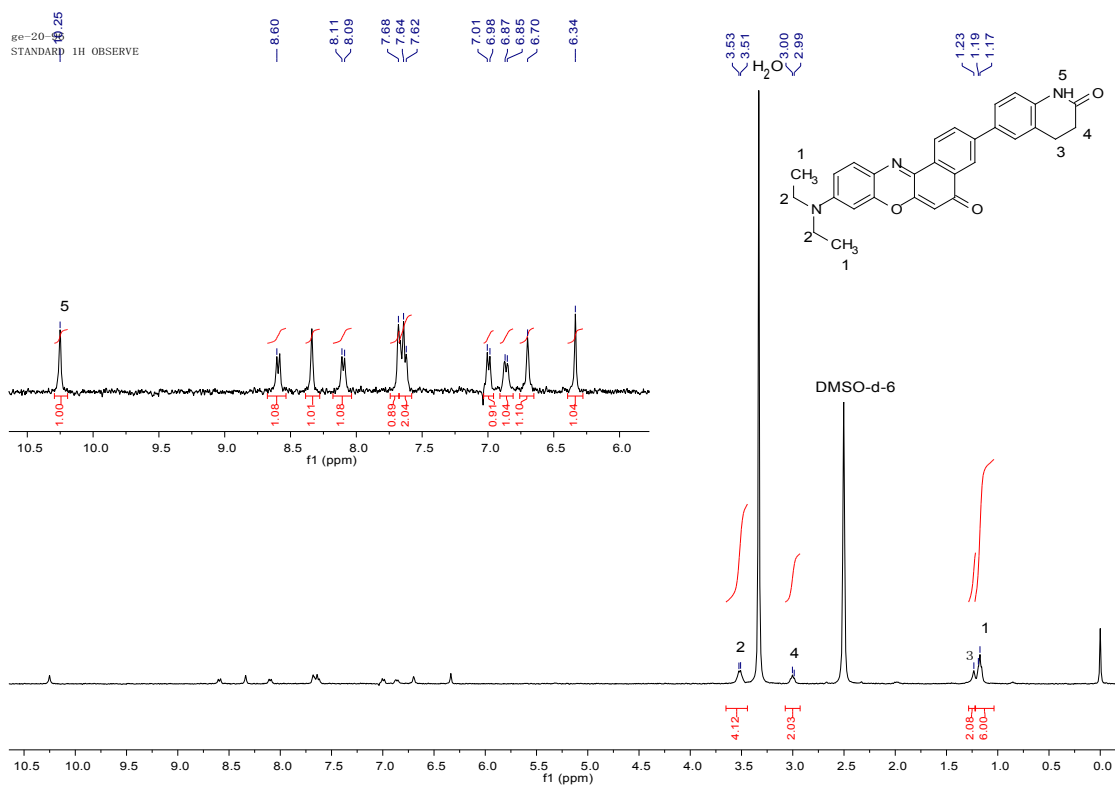

Fig. S33 <sup>1</sup>H NMR spectrum of dye 2e.

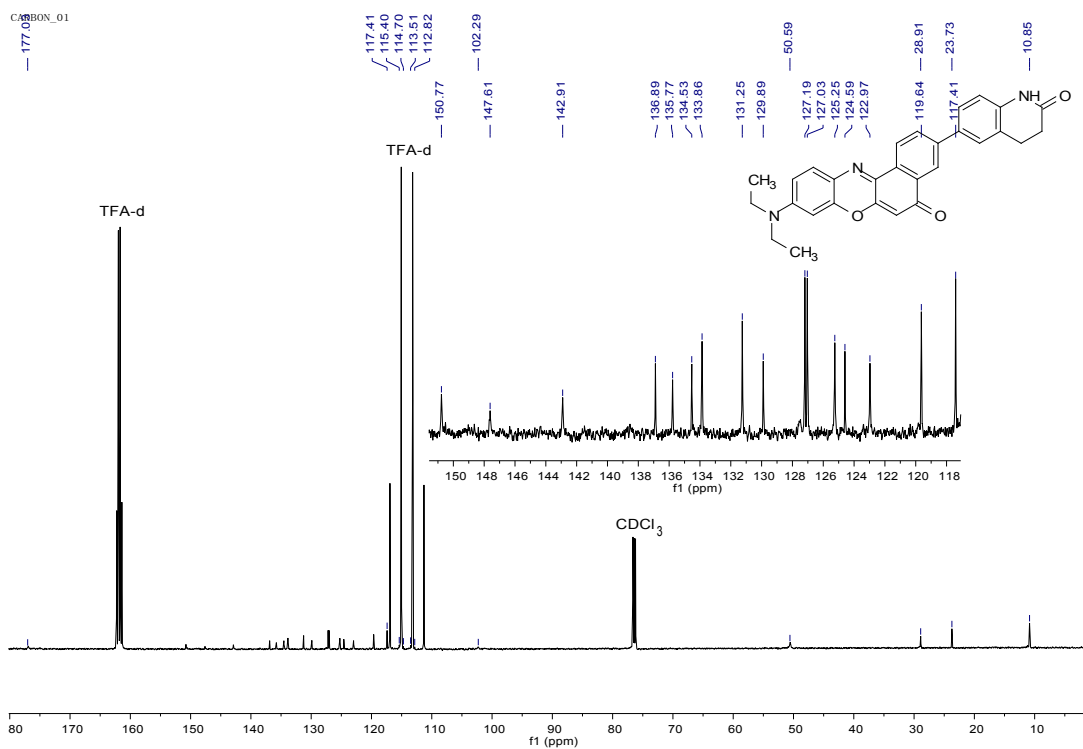

Fig. S34 <sup>13</sup>C NMR spectrum of dye 2e.

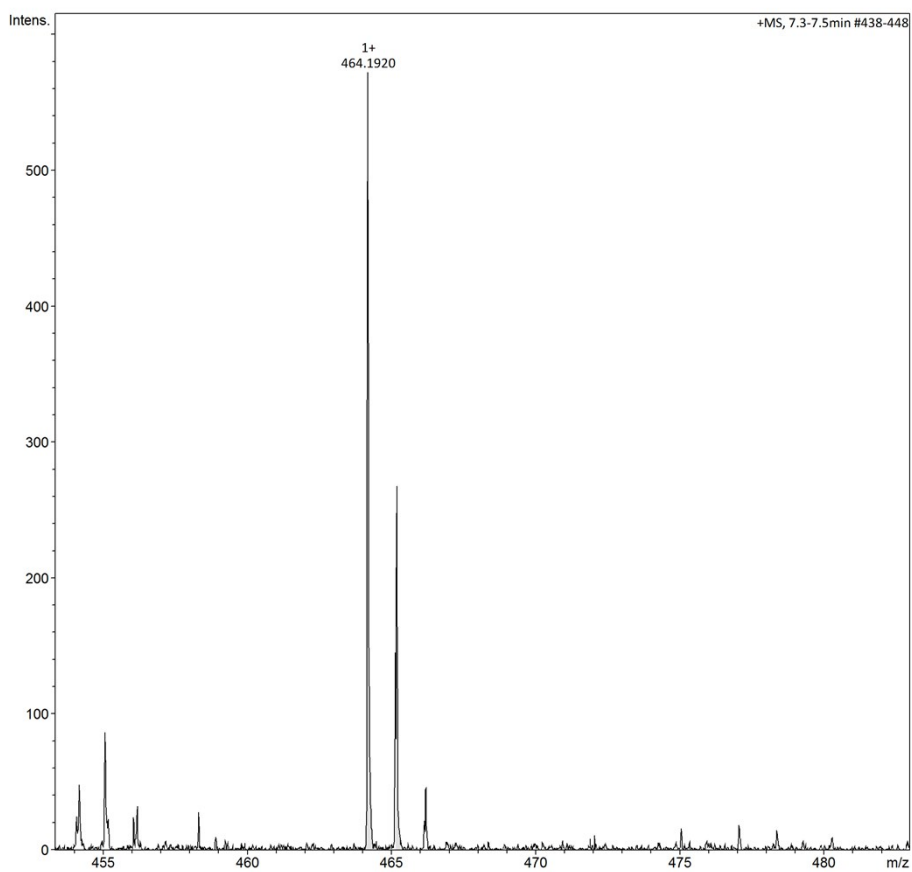

Fig. S35 HRMS (ESI<sup>+</sup>) spectrum of dye **2e**.

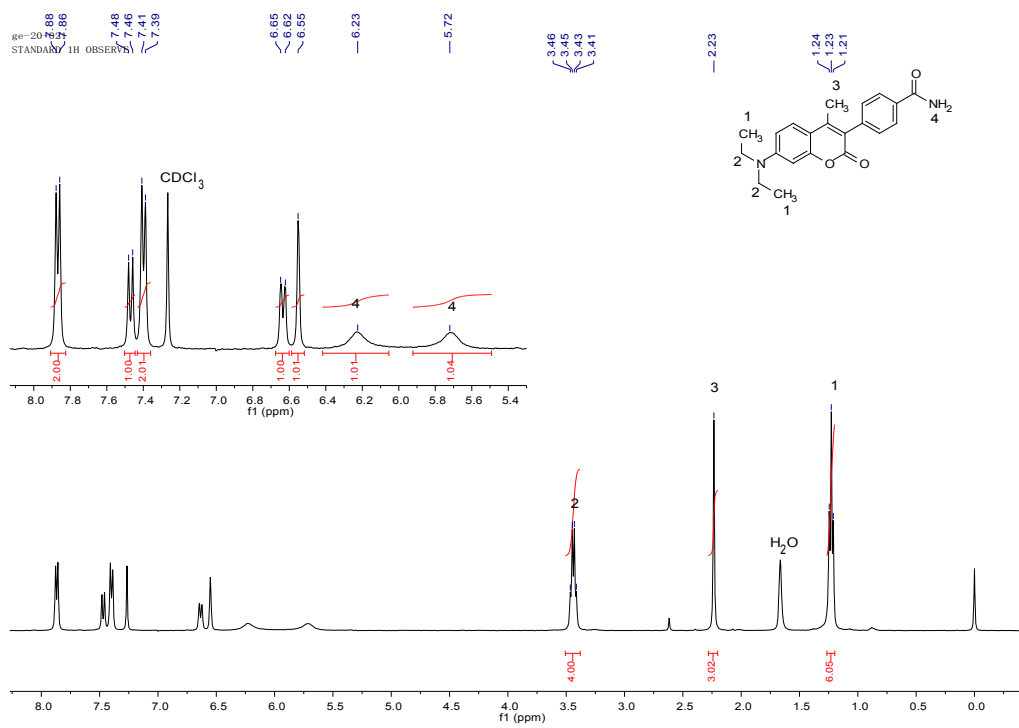

Fig. S36 <sup>1</sup>H NMR spectrum of dye **3a**.

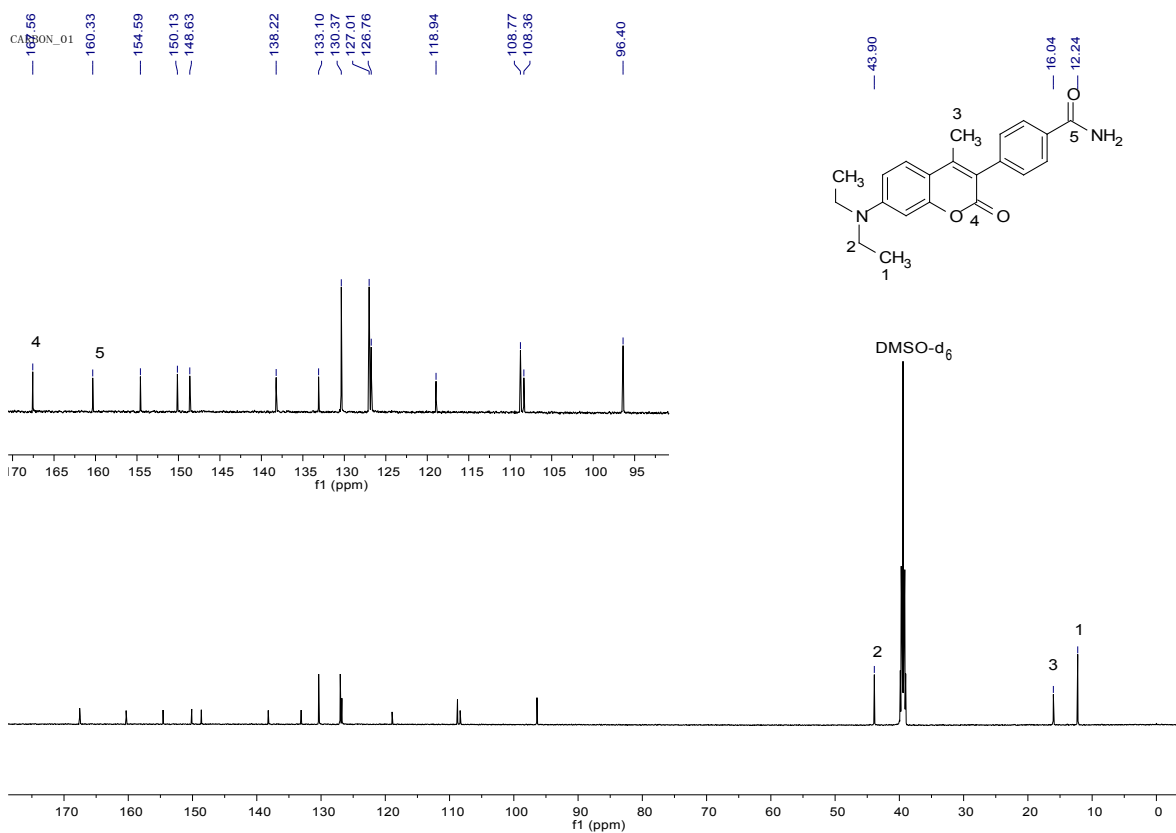

**Fig. S37** <sup>13</sup>C NMR spectrum of dye **3a**.

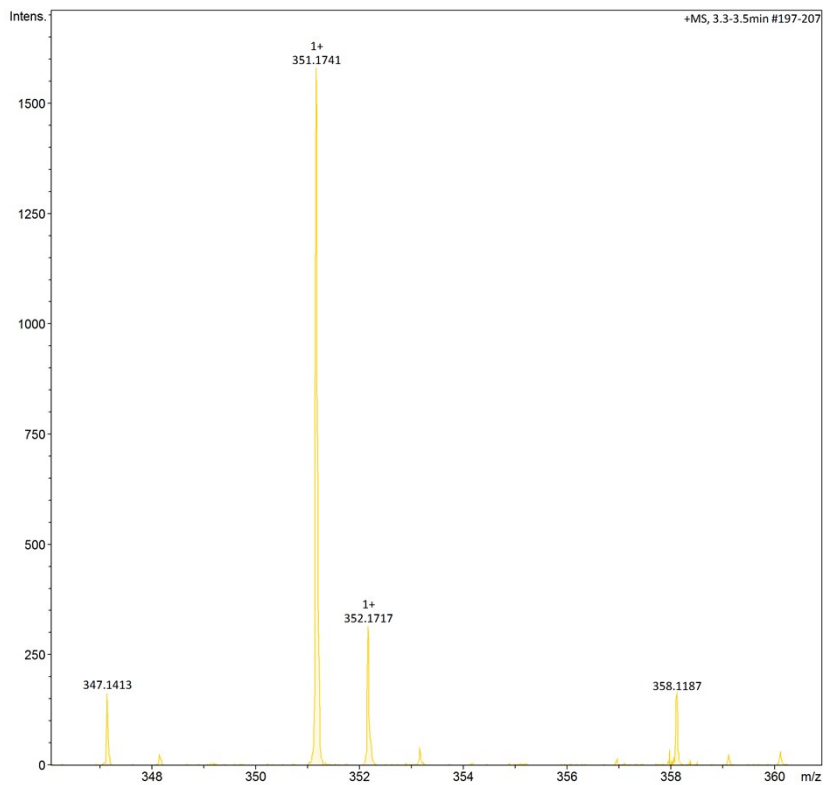

**Fig. S38** HRMS (ESI<sup>+</sup>) spectrum of dye **3a**.

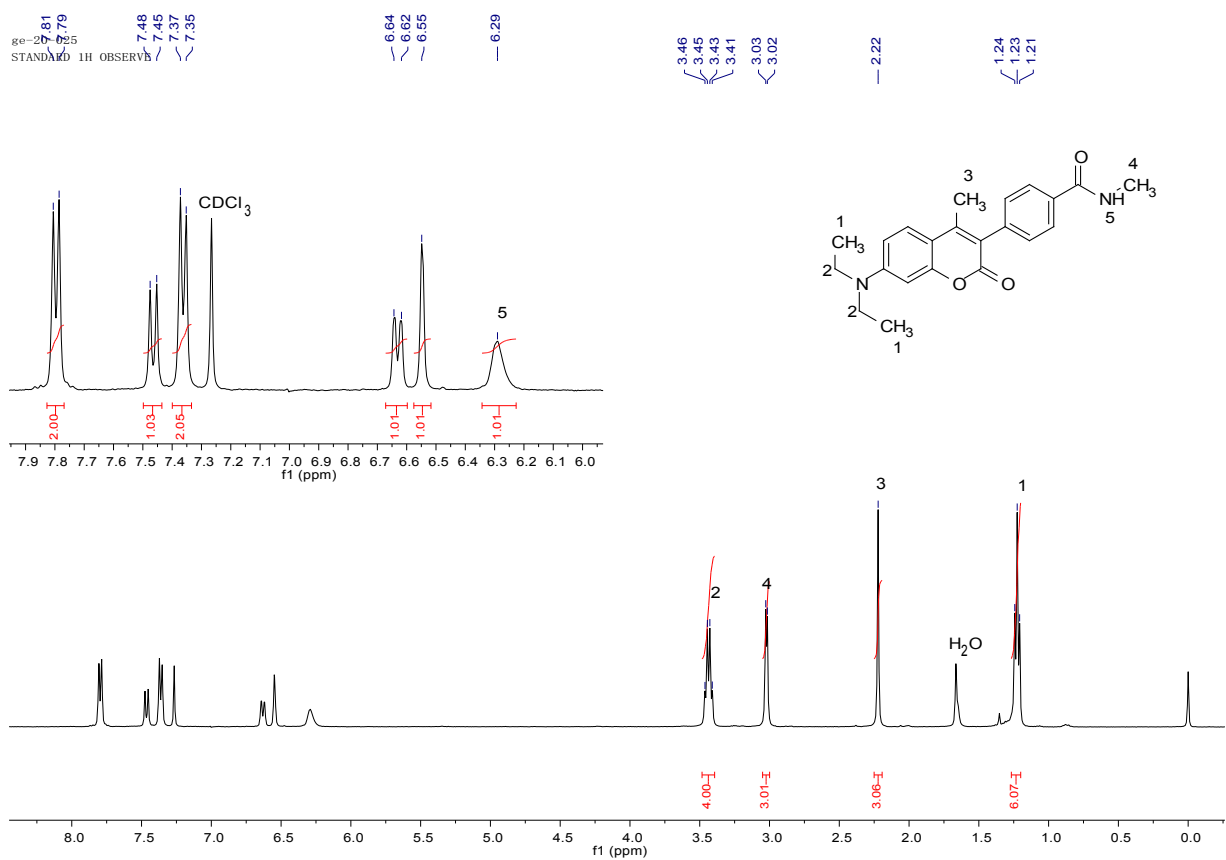

Fig. S39 <sup>1</sup>H NMR spectrum of dye **3b**.

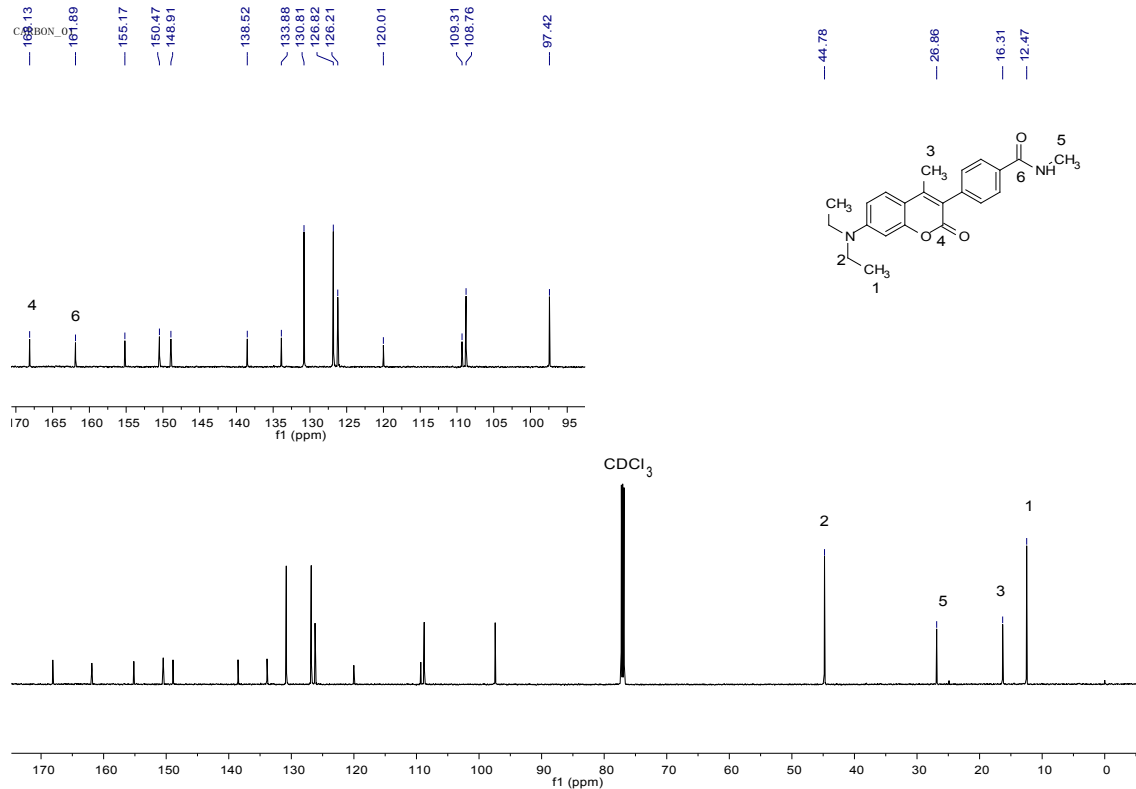

Fig. S40 <sup>13</sup>C NMR spectrum of dye **3b**.



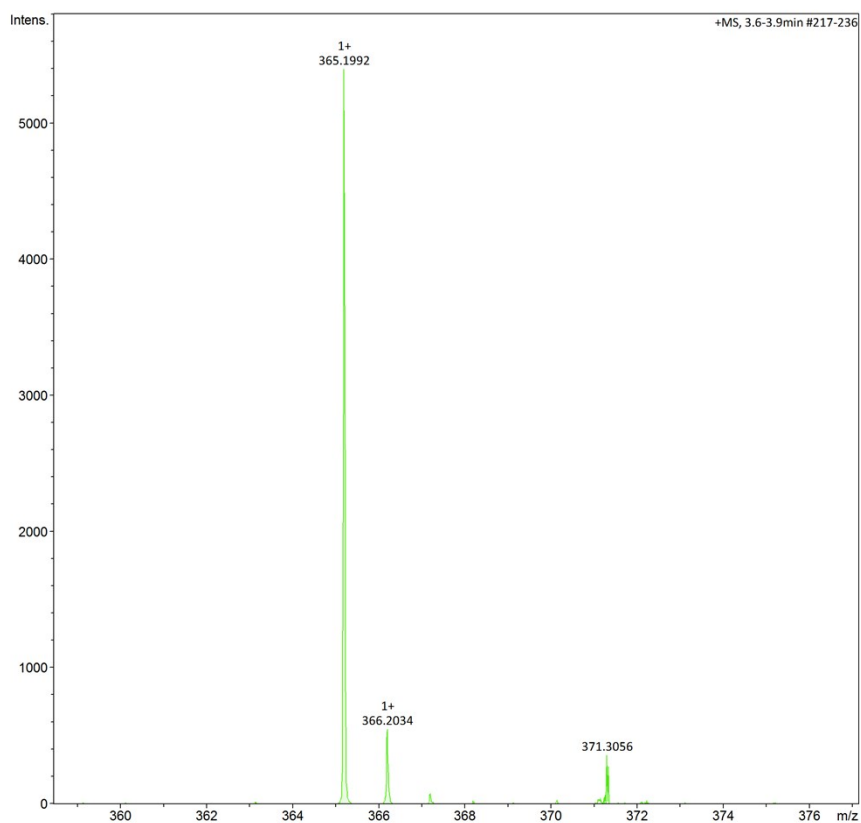

Fig. S41 HRMS (ESI<sup>+</sup>) spectrum of dye **3b**.

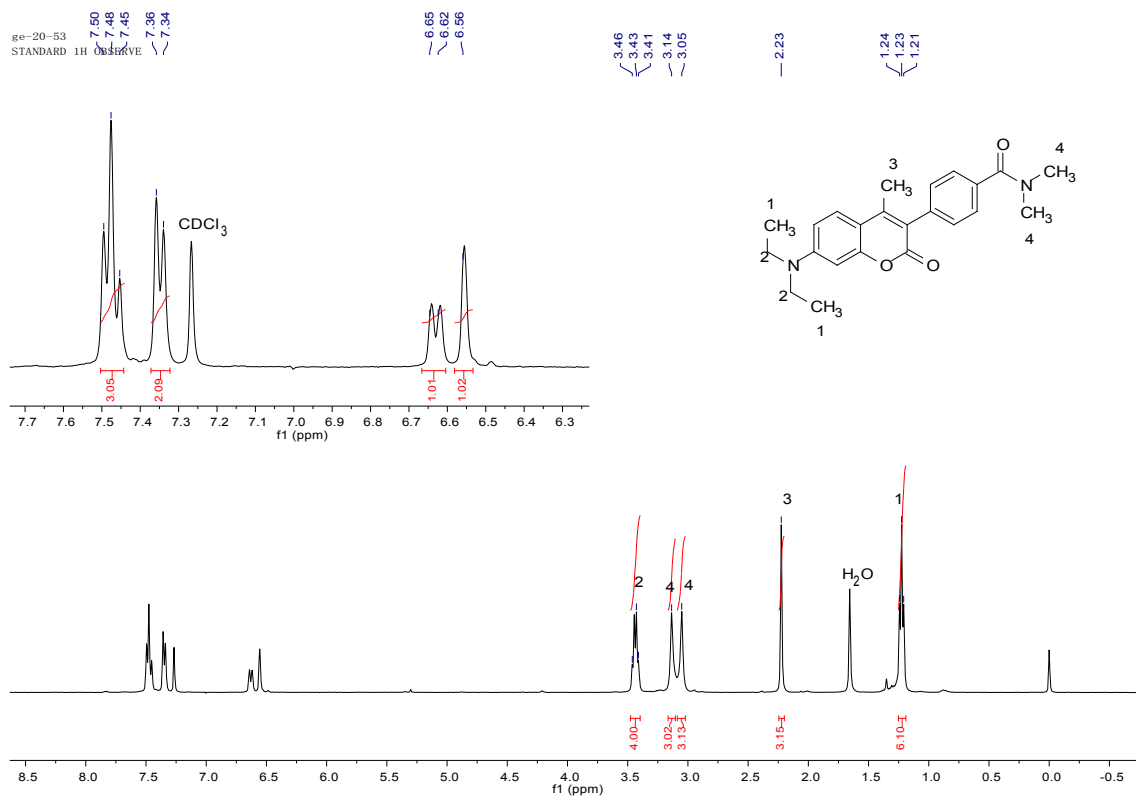

Fig. S42 <sup>1</sup>H NMR spectrum of dye **3c**.

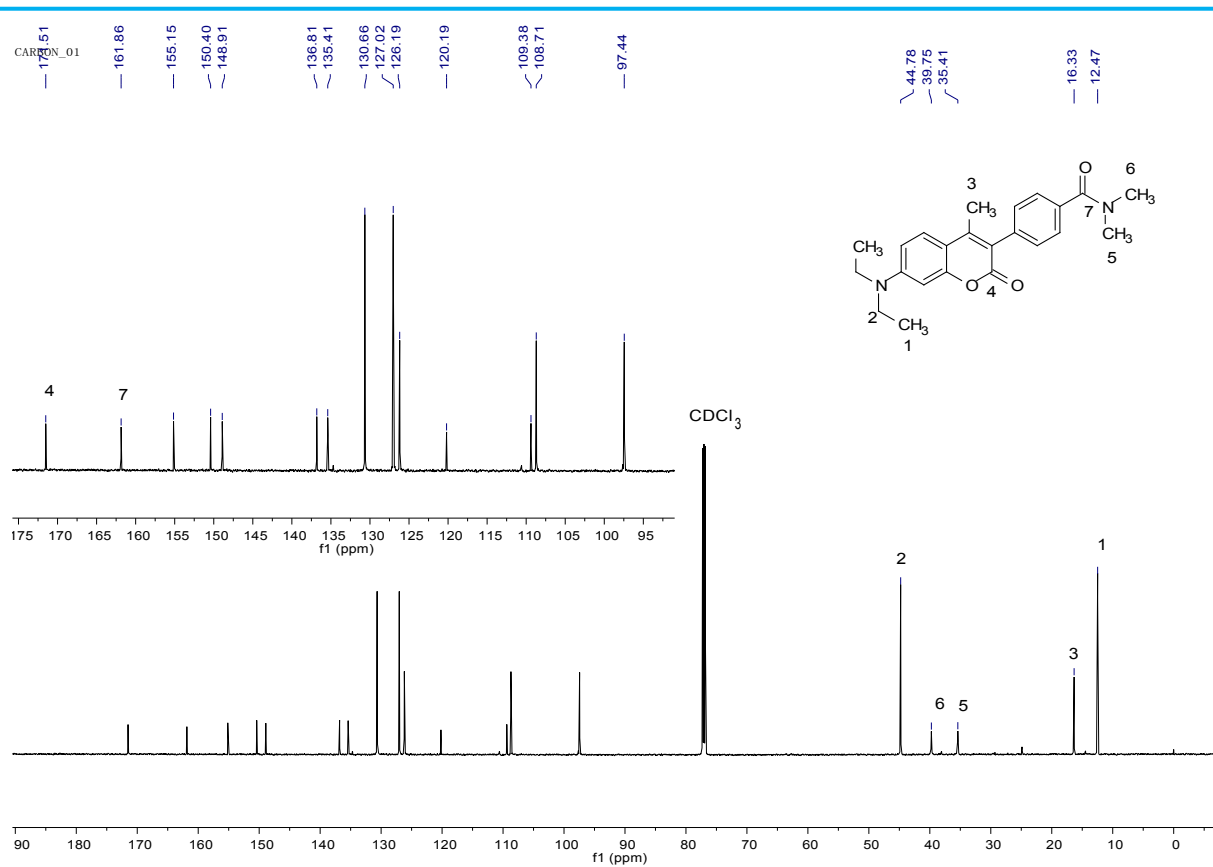

**Fig. S43** <sup>13</sup>C NMR spectrum of dye **3c**.

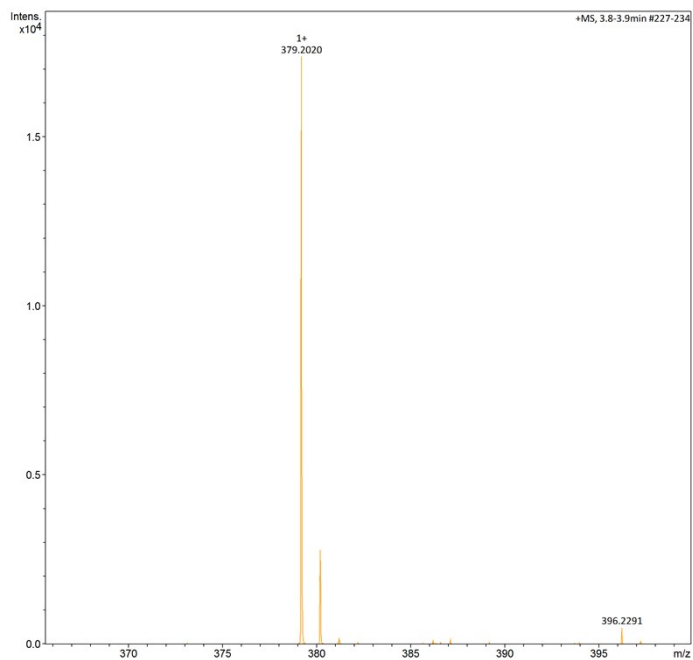

**Fig. S44** HRMS (ESI<sup>+</sup>) spectrum of dye **3c**.



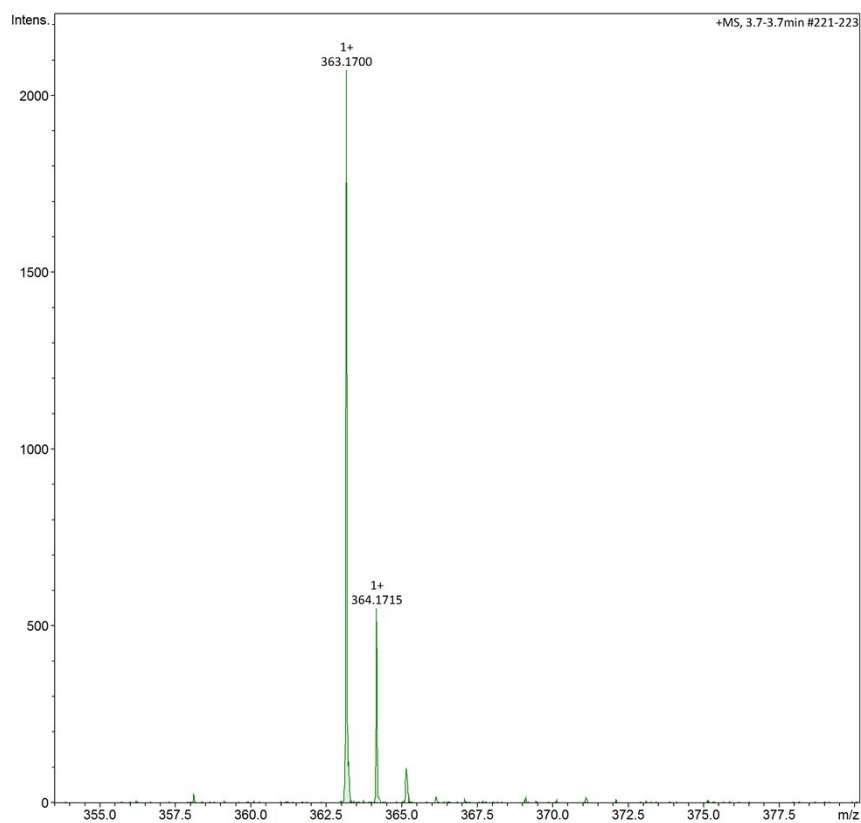

Fig. S47 HRMS (ESI<sup>+</sup>) spectrum of dye **3d**.

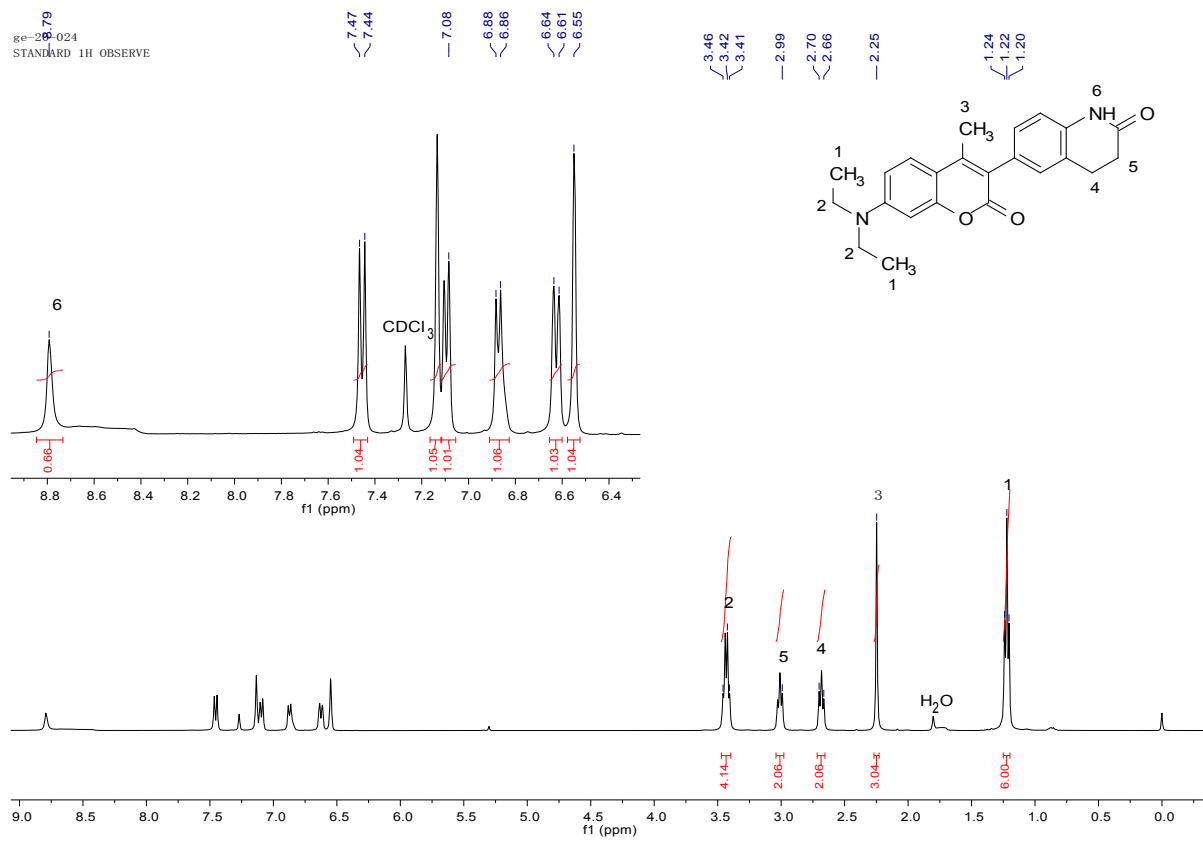

Fig. S48 <sup>1</sup>H NMR spectrum of dye 3e.

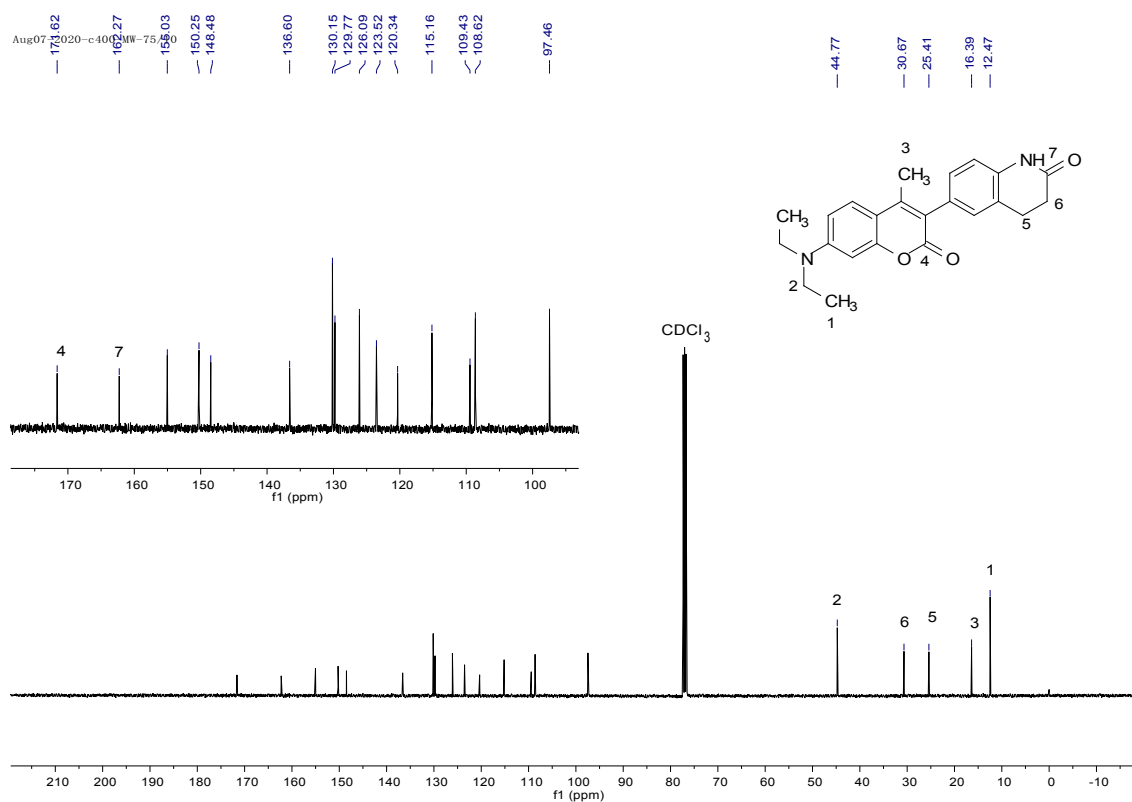

Fig. S49 <sup>13</sup>C NMR spectrum of dye 3e.

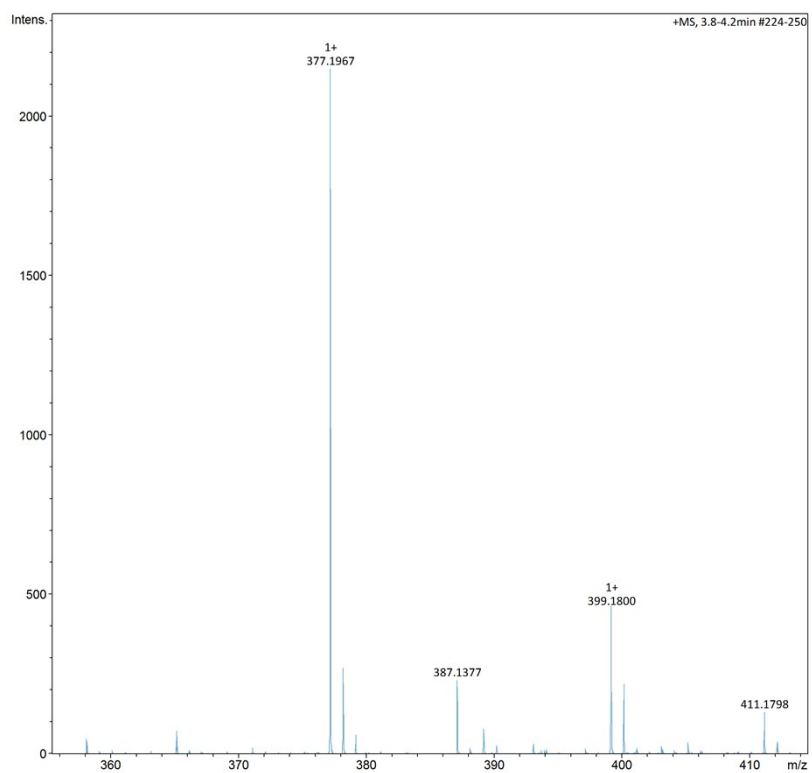

Fig. S50 HRMS (ESI<sup>+</sup>) spectrum of dye 3e.

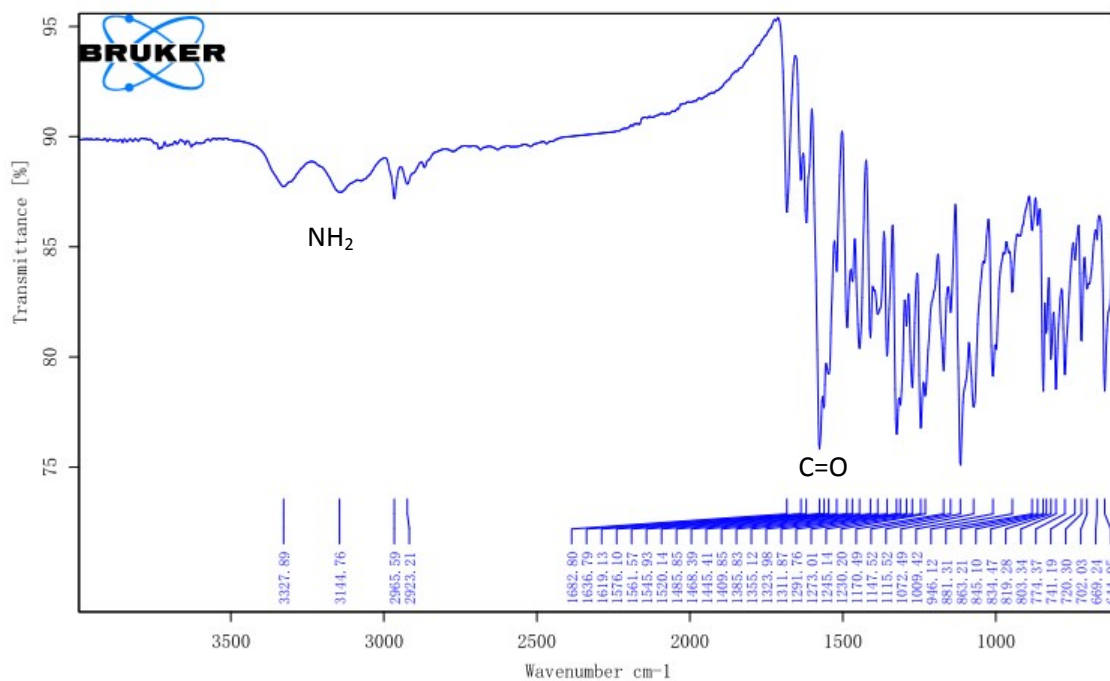

Fig. S51 Infrared spectra of dye 2a.

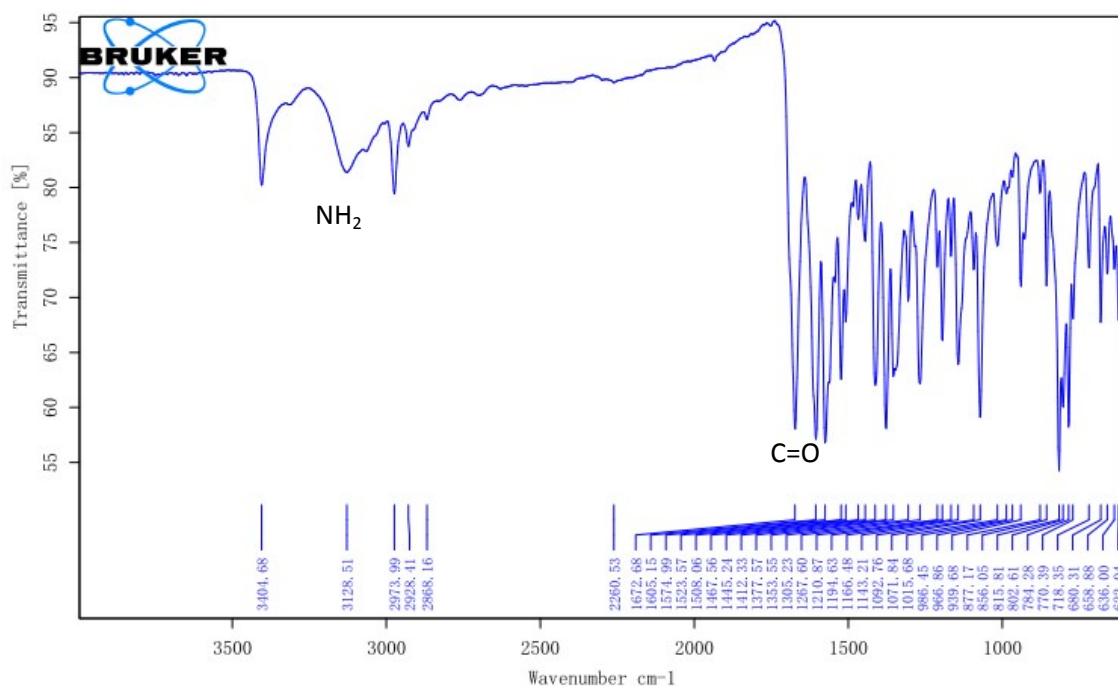

Fig. S52 Infrared spectra of dye 3a.
